# Supplementary material
Source: PubMed Central journal article supplement (PMC4049246)
Supplement: jo500520x_si_001.pdf [file jo500520x_si_001.pdf]

# Supporting Information

## ***Emission Tuning of Fluorescent Kinase Inhibitors: Conjugation Length and Substituent Effects***

*Jyothi Dhuguru,<sup>a</sup> Wenjun Liu,<sup>b</sup> Walter G. Gonzalez,<sup>c</sup> W. Michael Babinchak,<sup>a</sup> Jaroslava Miksovska,<sup>c</sup> Ralf Landgraf<sup>b</sup> and James N. Wilson<sup>a\*</sup>*

<sup>a</sup>Department of Chemistry, University of Miami, 1301 Memorial Drive, Coral Gables, FL 33146, United States.

<sup>b</sup>Department of Biochemistry and Molecular Biology, University of Miami, Miami, Florida 33101-6129, United States

<sup>c</sup>Department of Chemistry and Biochemistry, Florida International University, 11200 SW 8<sup>th</sup> Street, Miami, FL 33199, United States

---

|                                                                                           | <u>pages</u> |
|-------------------------------------------------------------------------------------------|--------------|
| <b>Figures S1-S15:</b> <sup>1</sup> H-NMR and <sup>13</sup> C-NMR spectra of <b>1a-3e</b> | S2-S16       |
| <b>Figure S16:</b> Frontier MOs of <b>1a-e</b>                                            | S17          |
| <b>Figure S17:</b> Frontier MOs of <b>3a-e</b>                                            | S17          |
| <b>Figure S18:</b> Solvent dependent emission spectra of <b>1a-3e</b> .                   | S18          |
| <b>Tables S1-S15:</b> Coordinates of optimized geometries for <b>1a-3e</b>                | S19-S33      |

---

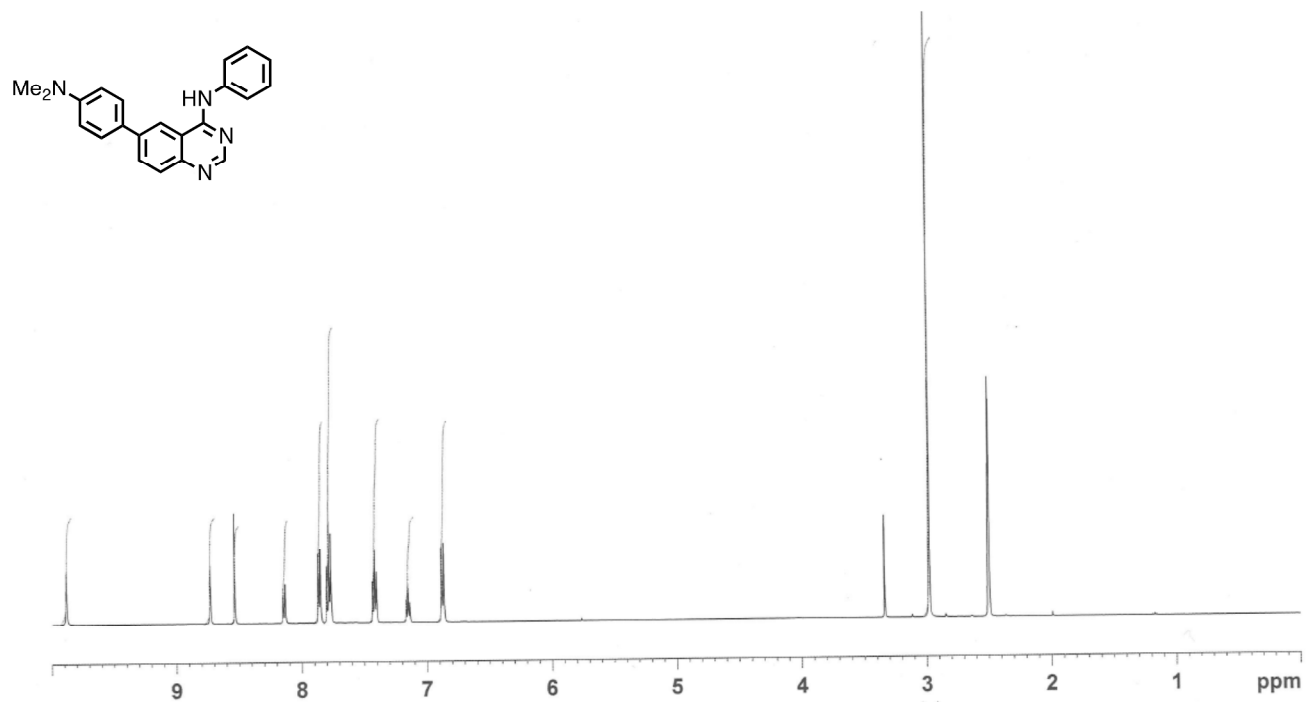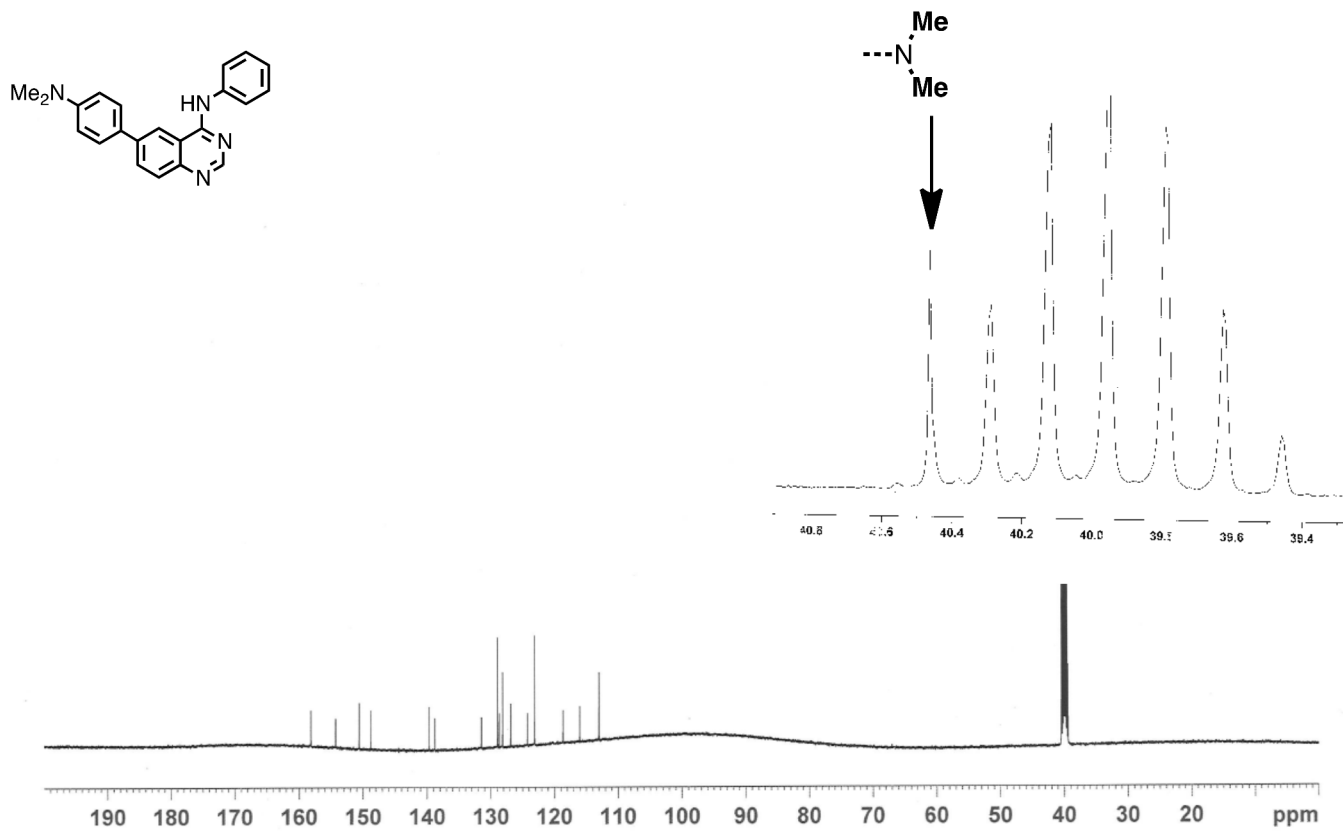

**Figure S1.**  $^1\text{H}$  (top) and  $^{13}\text{C}$  (bottom) NMRs of **1a**.

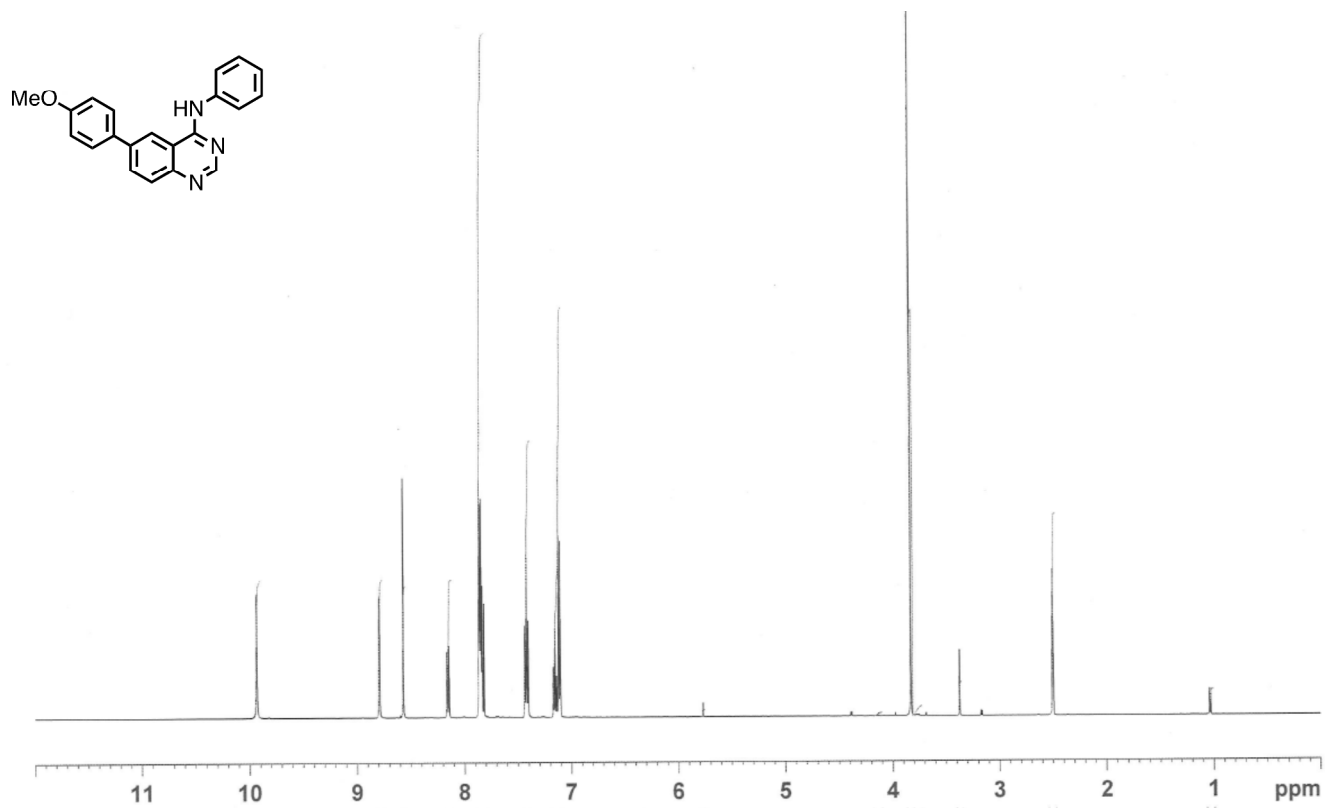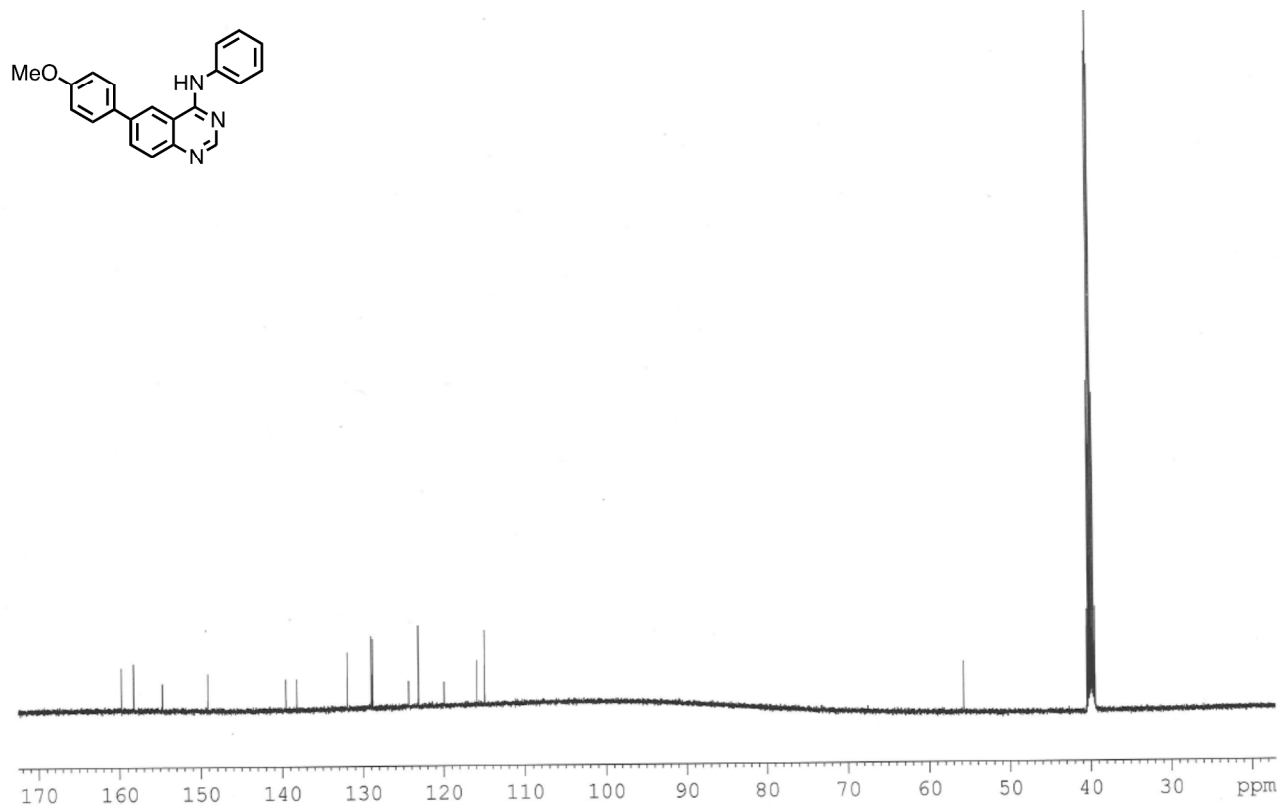

**Figure S2.**  $^1\text{H}$  (top) and  $^{13}\text{C}$  (bottom) NMRs of 1b.

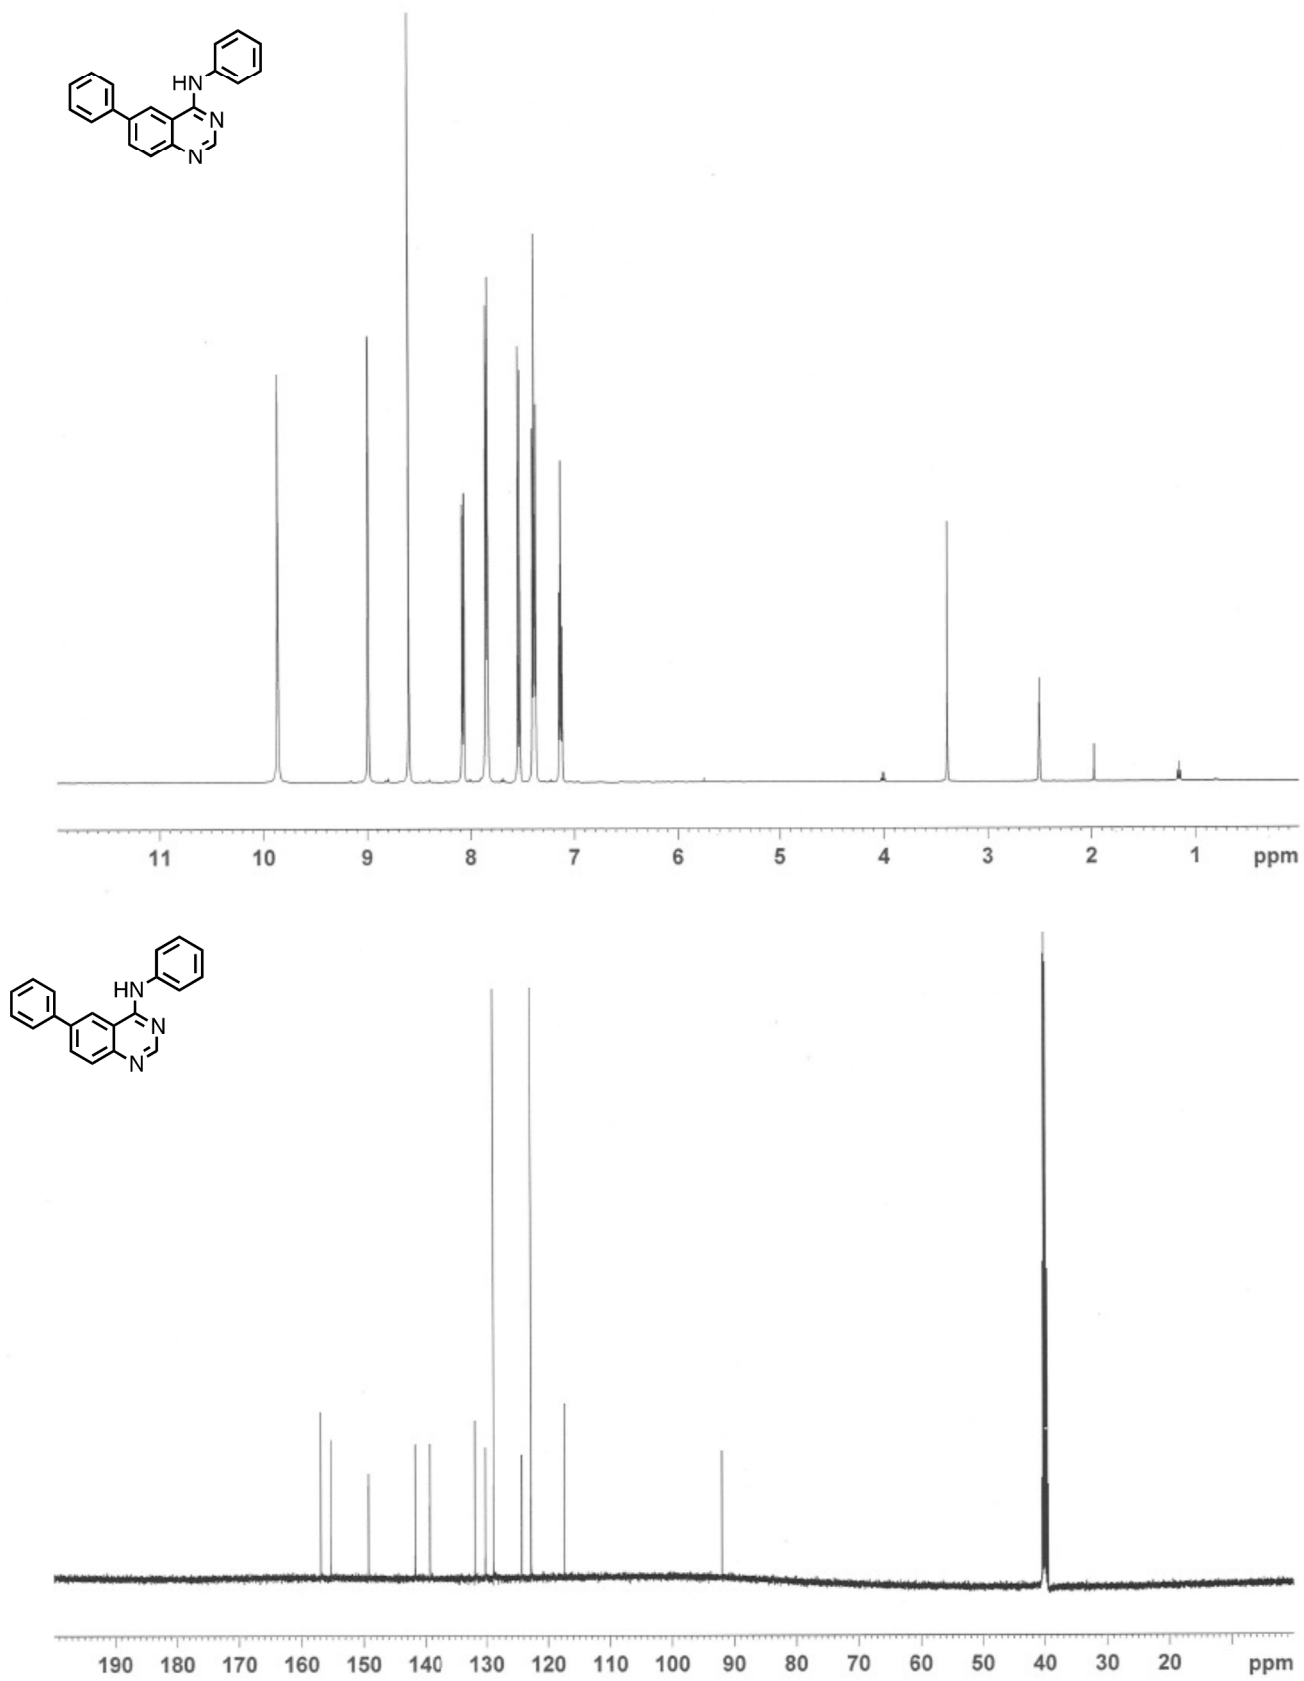

**Figure S3.**  $^1\text{H}$  (top) and  $^{13}\text{C}$  (bottom) NMRs of **1c**.

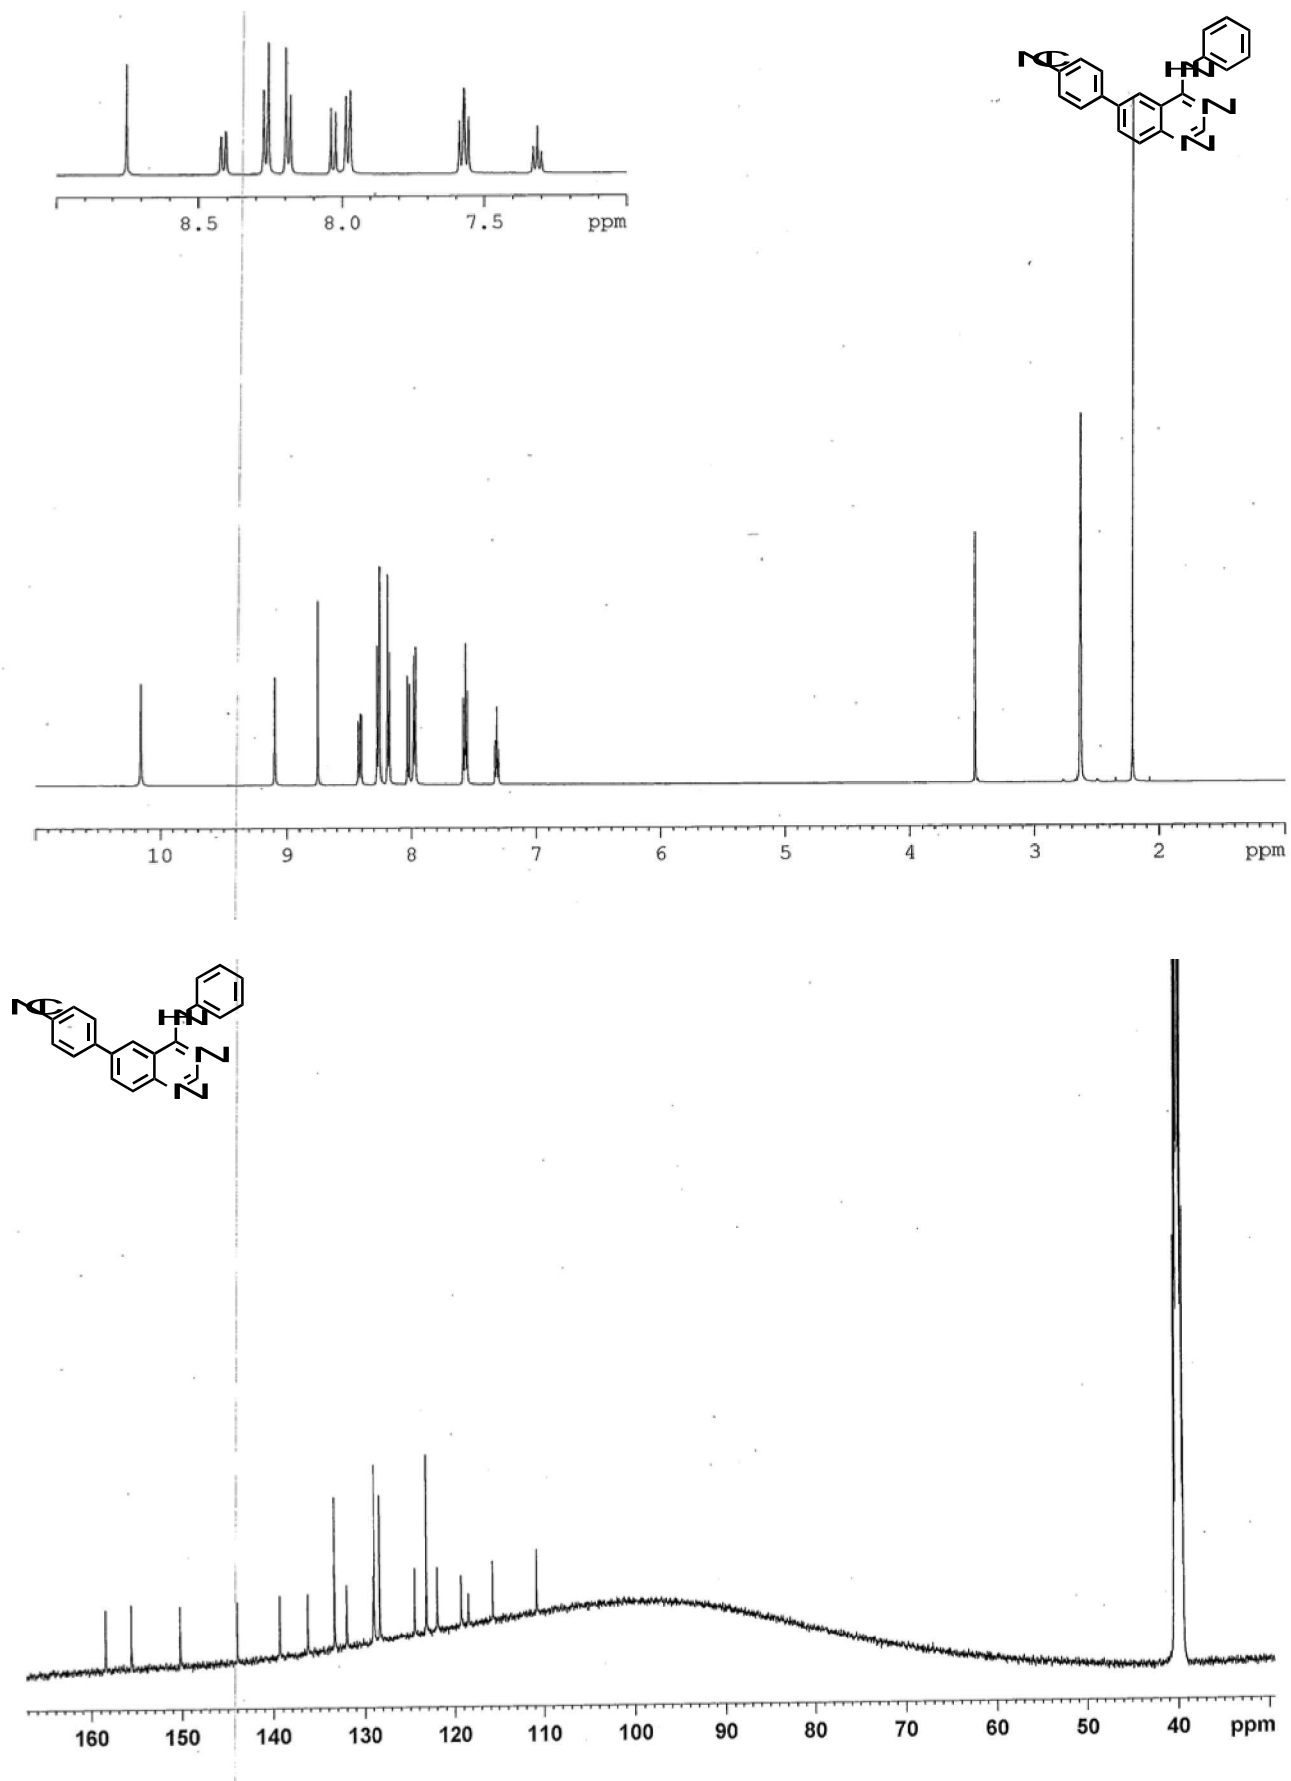

Figure S4.  $^1\text{H}$  (top) and  $^{13}\text{C}$  (bottom) NMRs of **1d**.

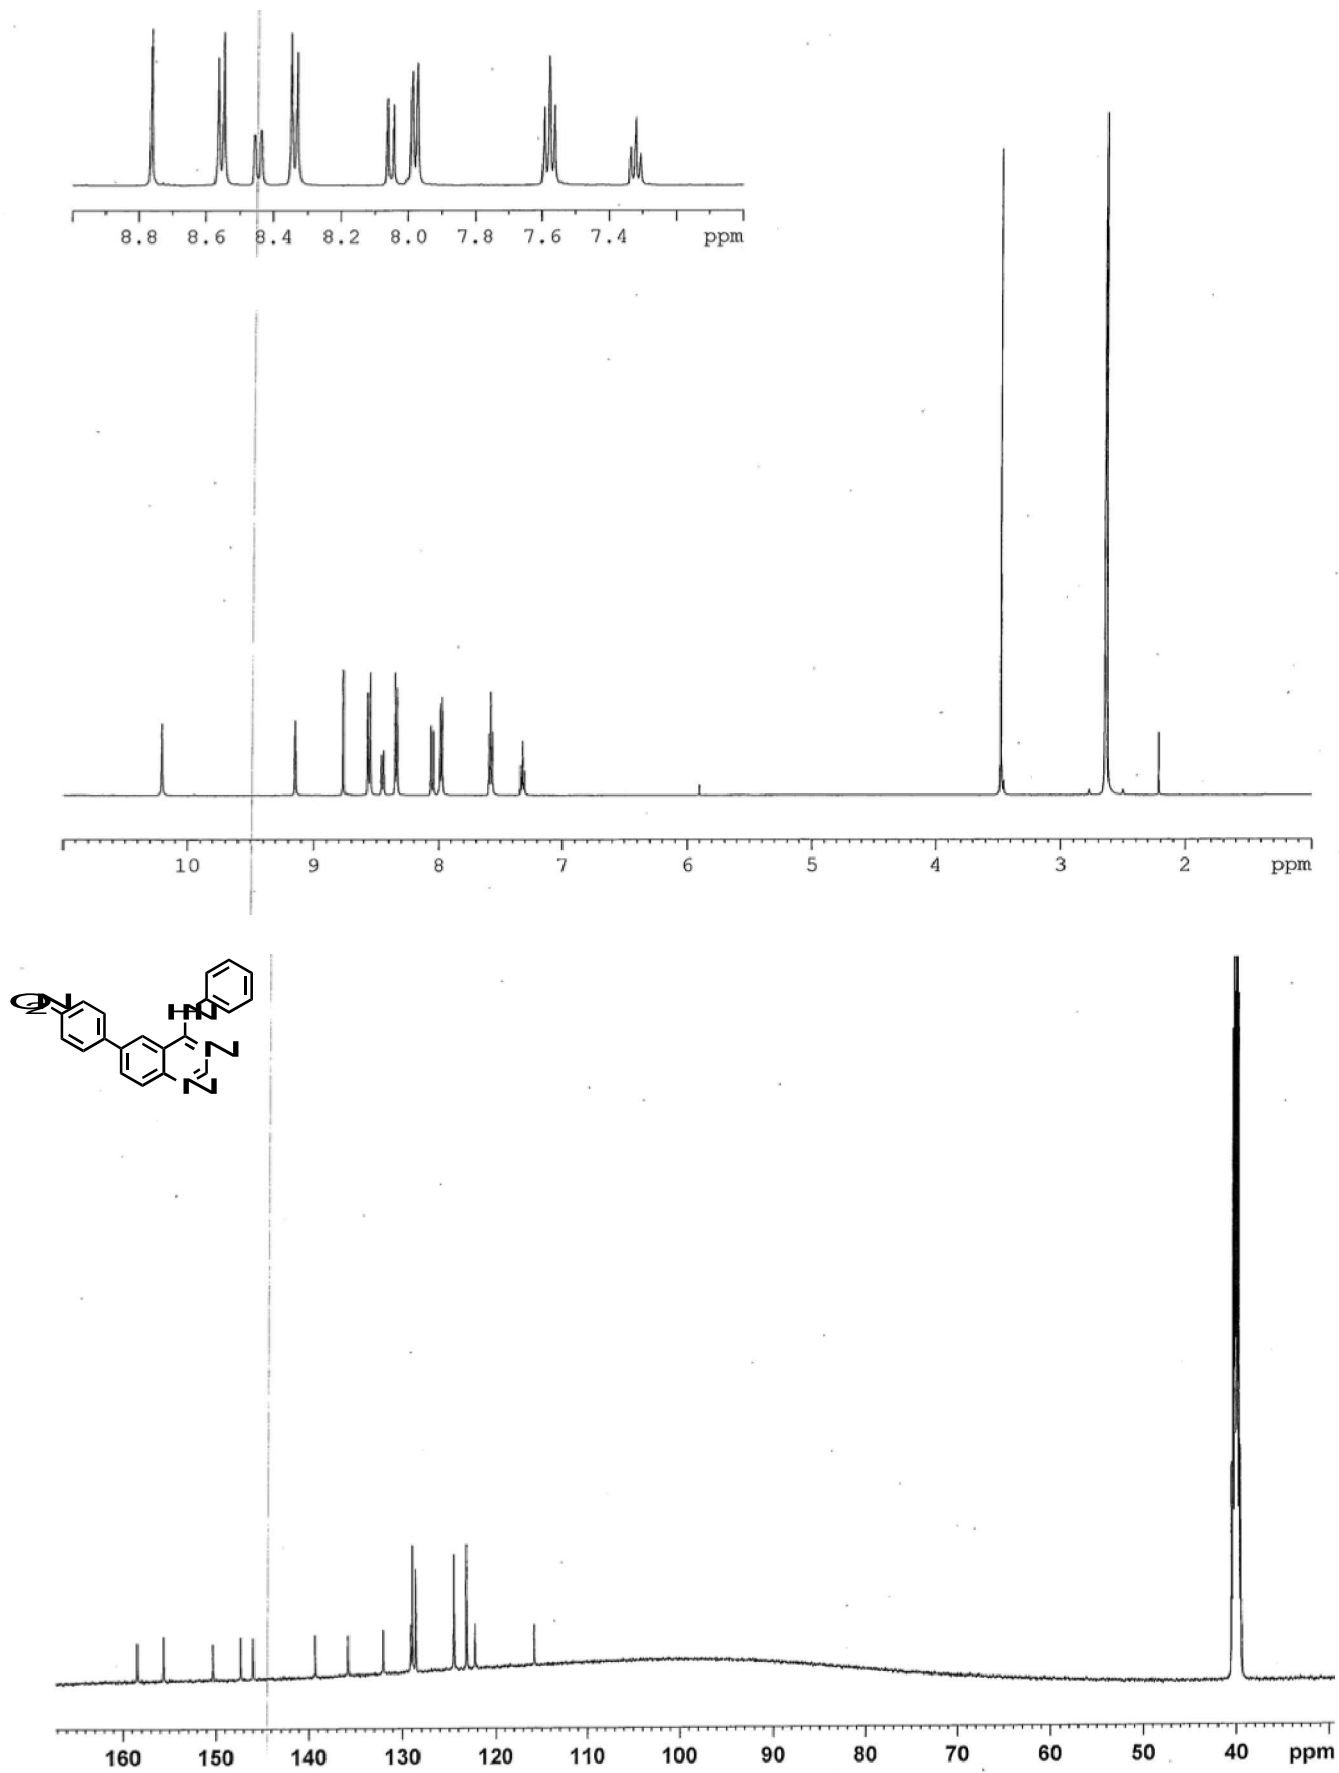

Figure S5.  $^1\text{H}$  (top) and  $^{13}\text{C}$  (bottom) NMRs of **1e**.

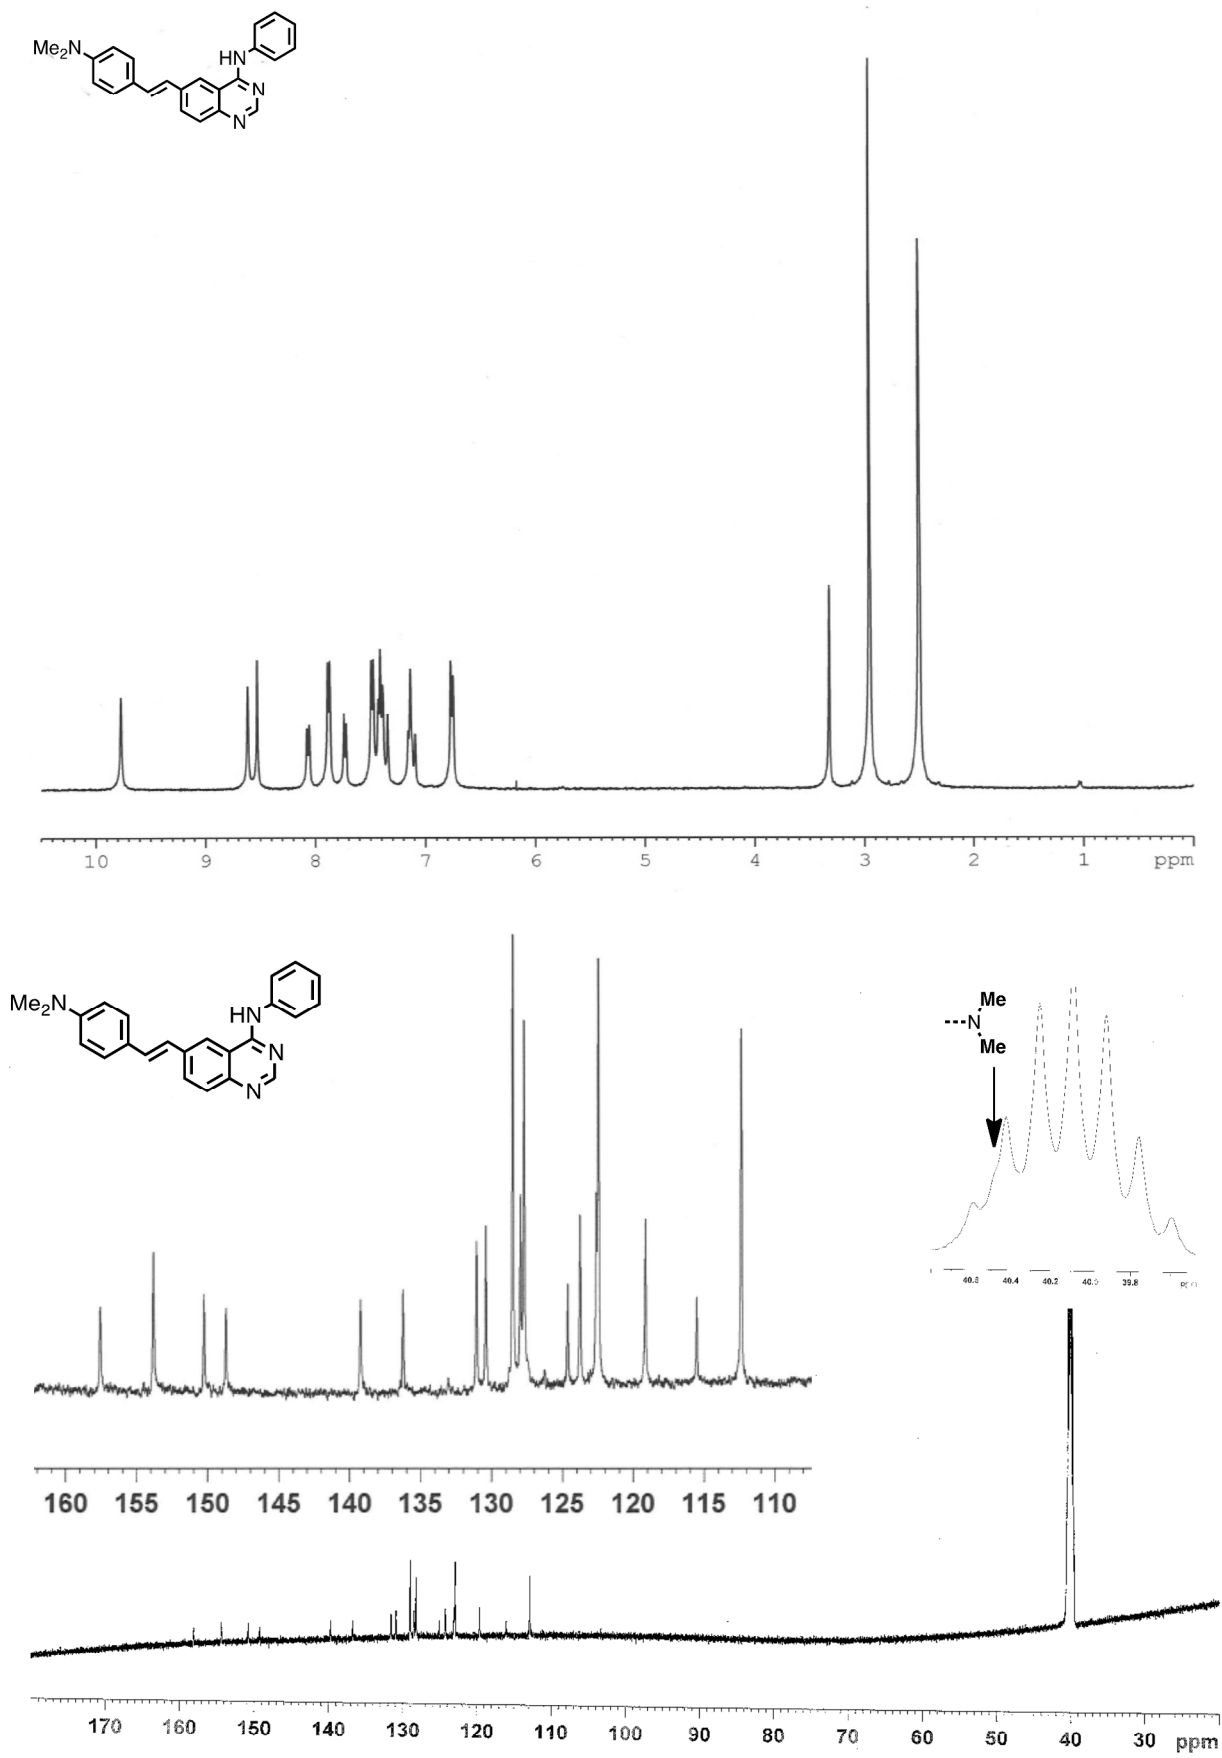

Figure S6.  $^1\text{H}$  (top) and  $^{13}\text{C}$  (bottom) NMRs of **2a**.

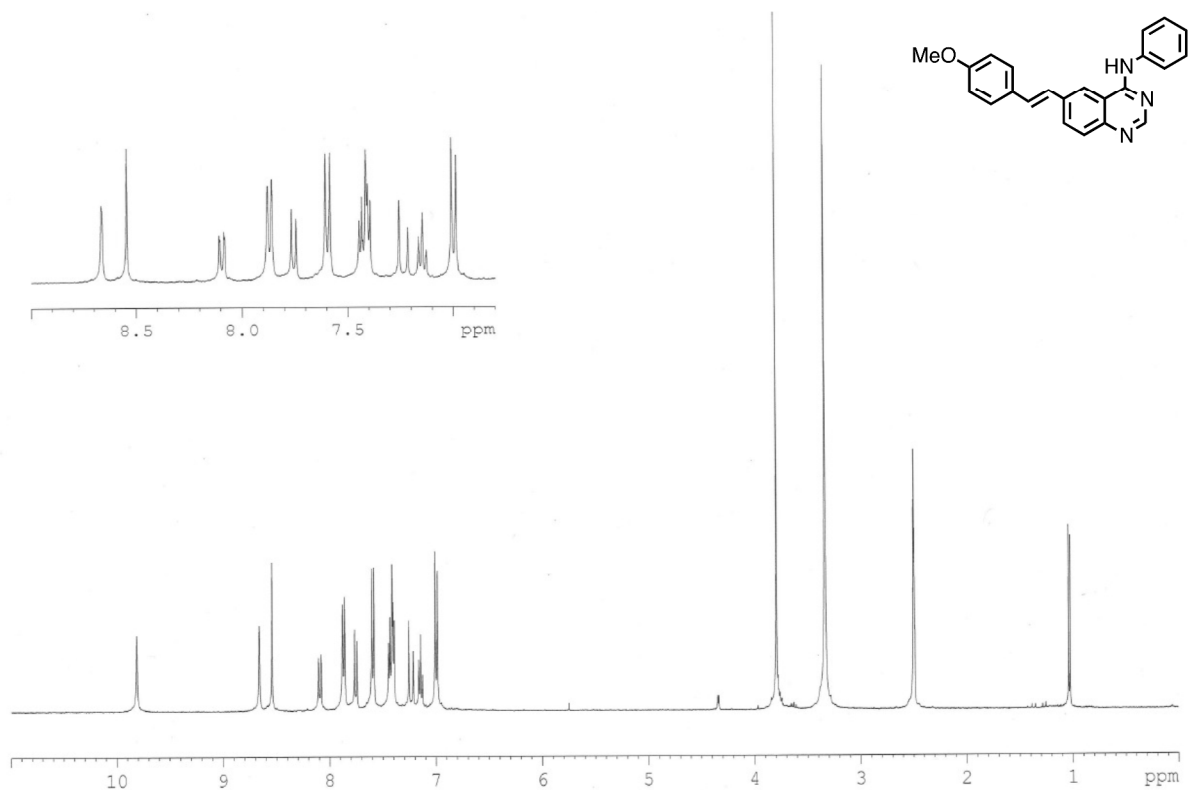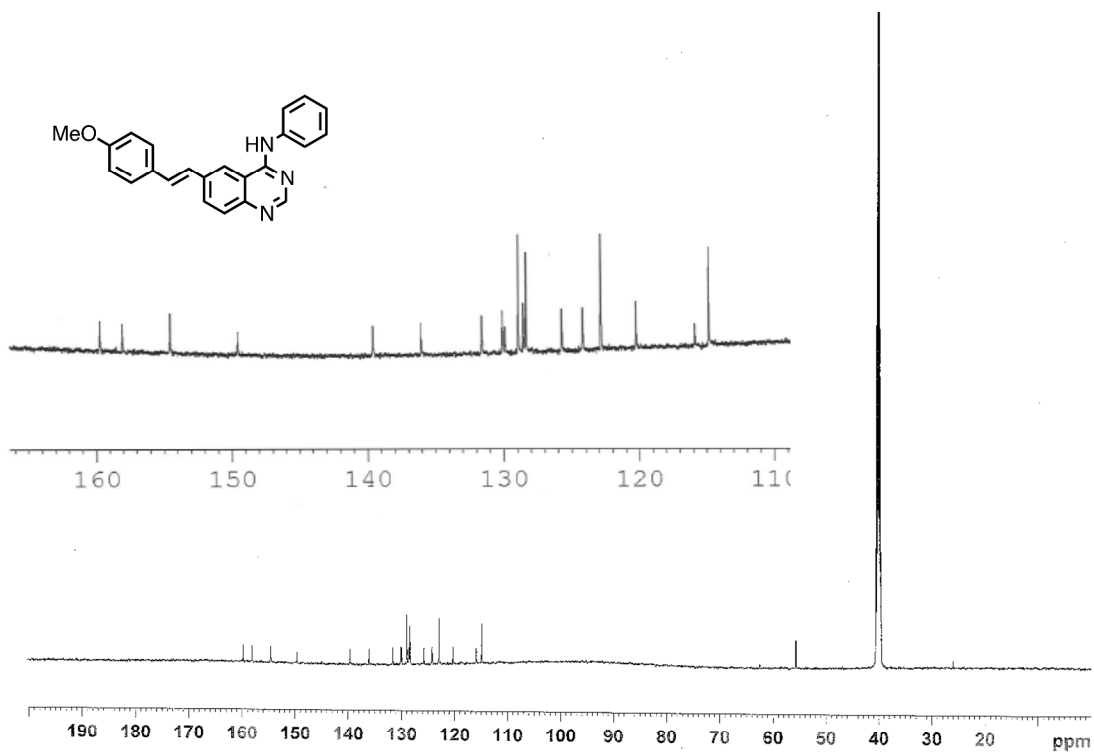

**Figure S7.**  $^1\text{H}$  (top) and  $^{13}\text{C}$  (bottom) NMRs of **2b** (cocrystallized with isopropanol, 1.03 and 4.33 ppm in  $^1\text{H}$  spectrum and 27.0 and 62.4 ppm in  $^{13}\text{C}$  spectrum).



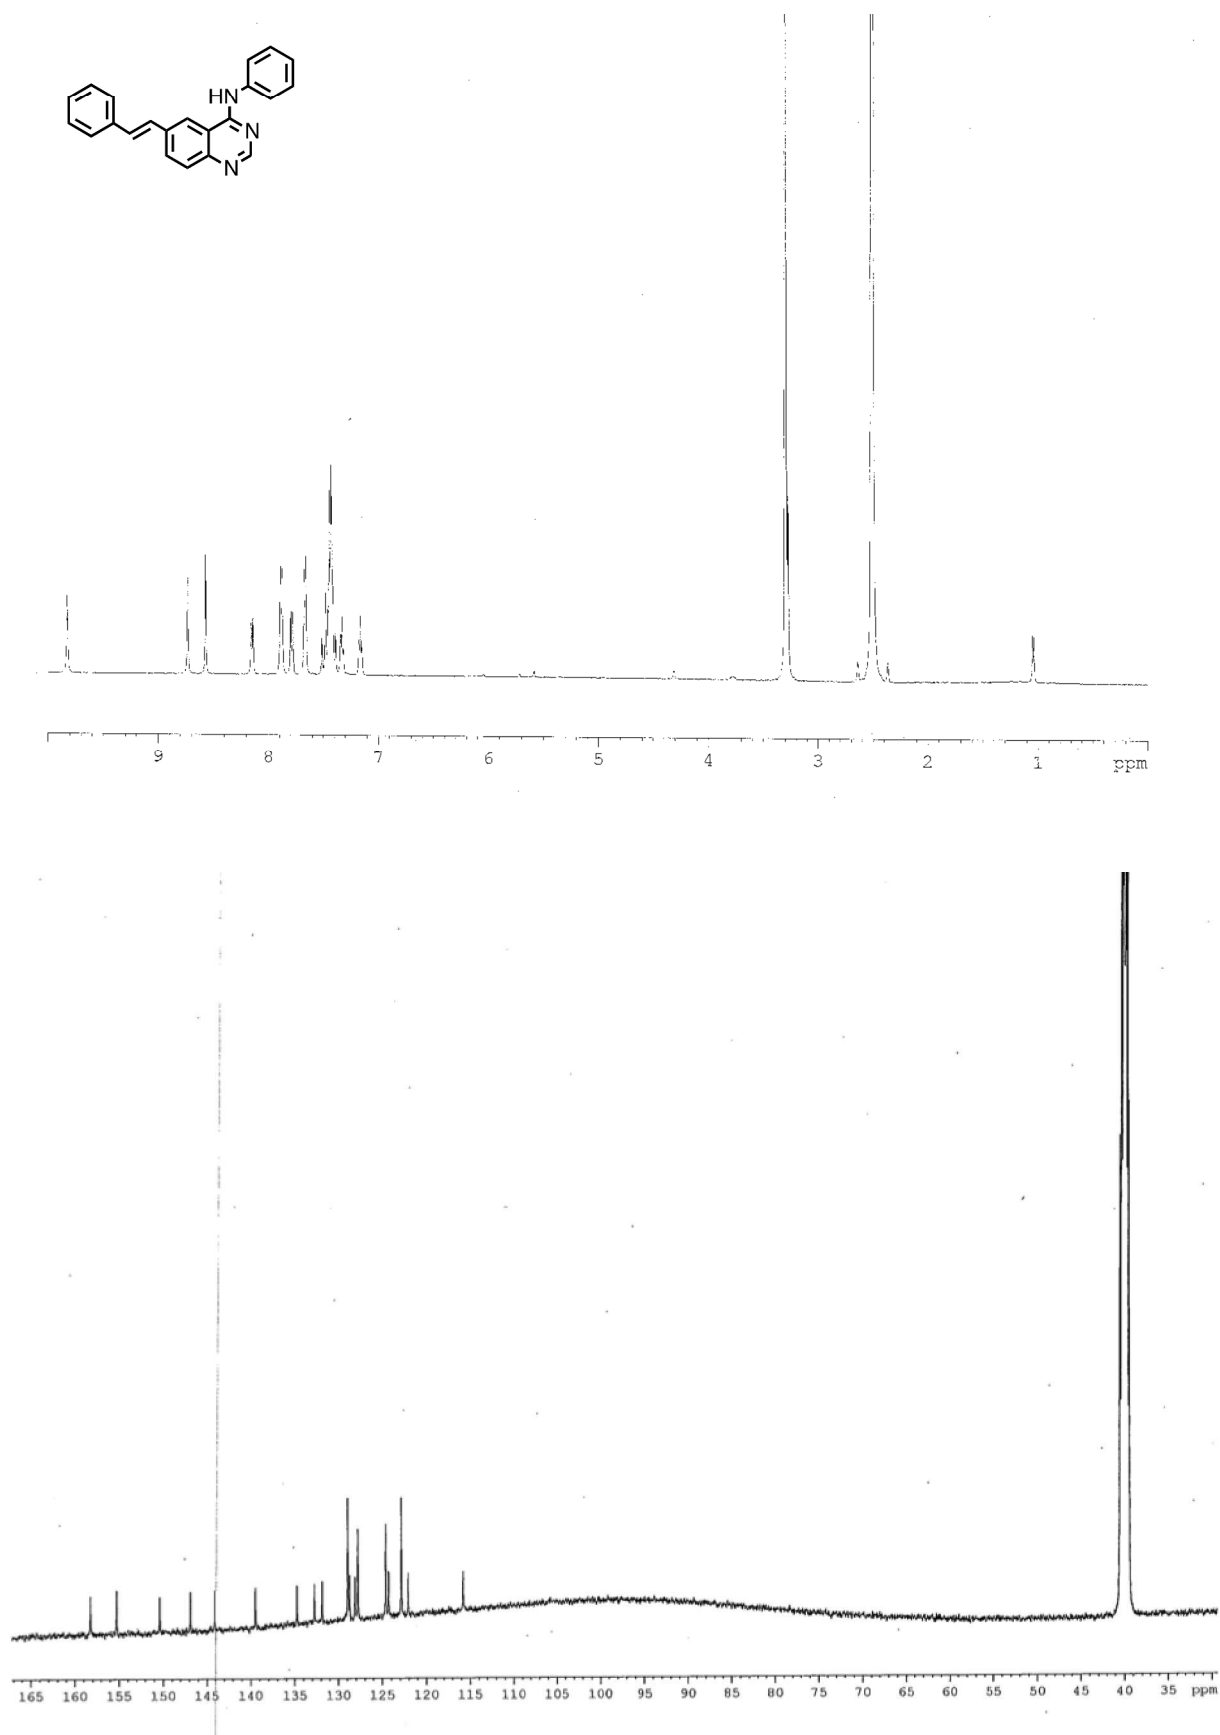

**Figure S8.**  $^1\text{H}$  (top) and  $^{13}\text{C}$  (bottom) NMRs of **2c**.

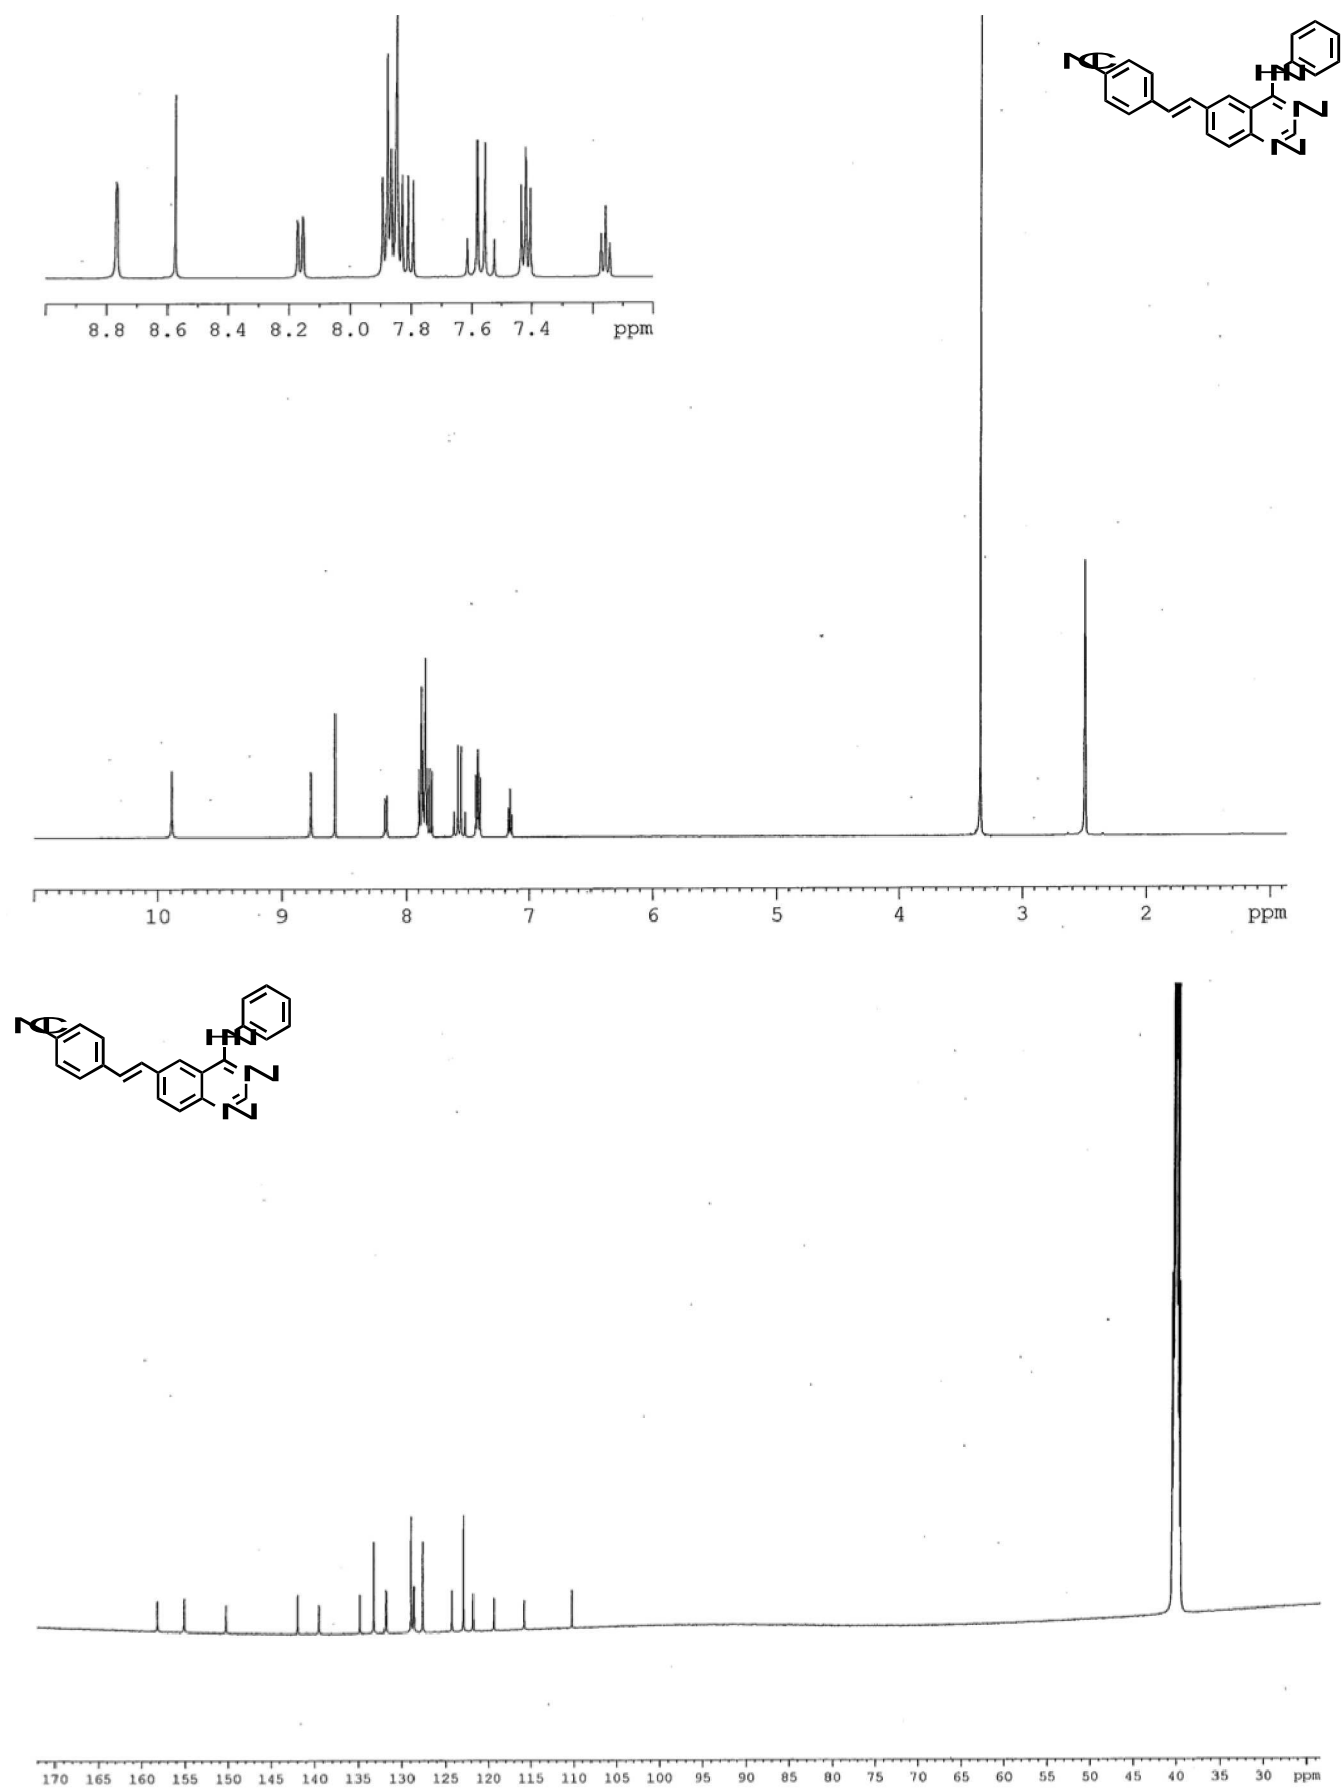

**Figure S9.**  $^1\text{H}$  (top) and  $^{13}\text{C}$  (bottom) NMRs of **2d**.

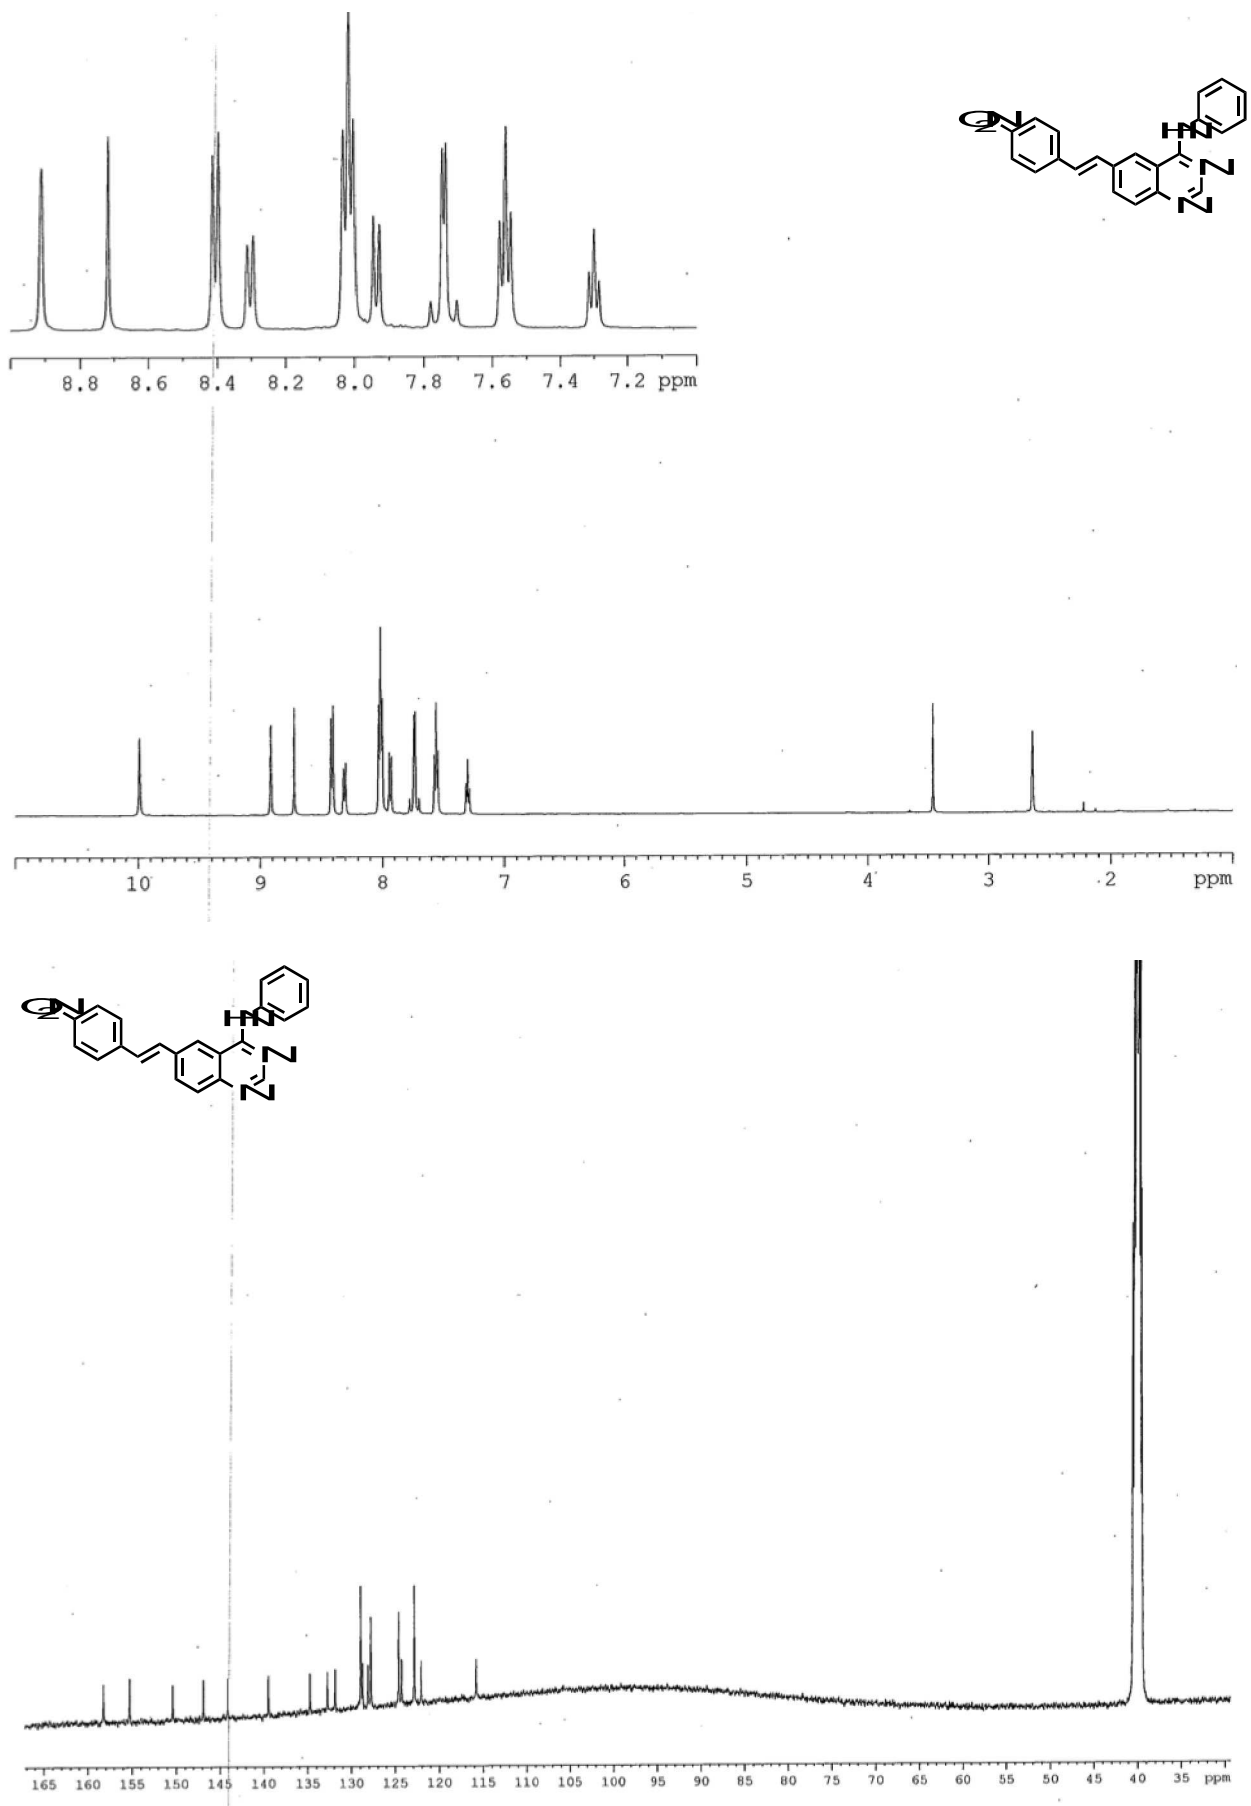

Figure S10.  $^1\text{H}$  (top) and  $^{13}\text{C}$  (bottom) NMRs of 2e.

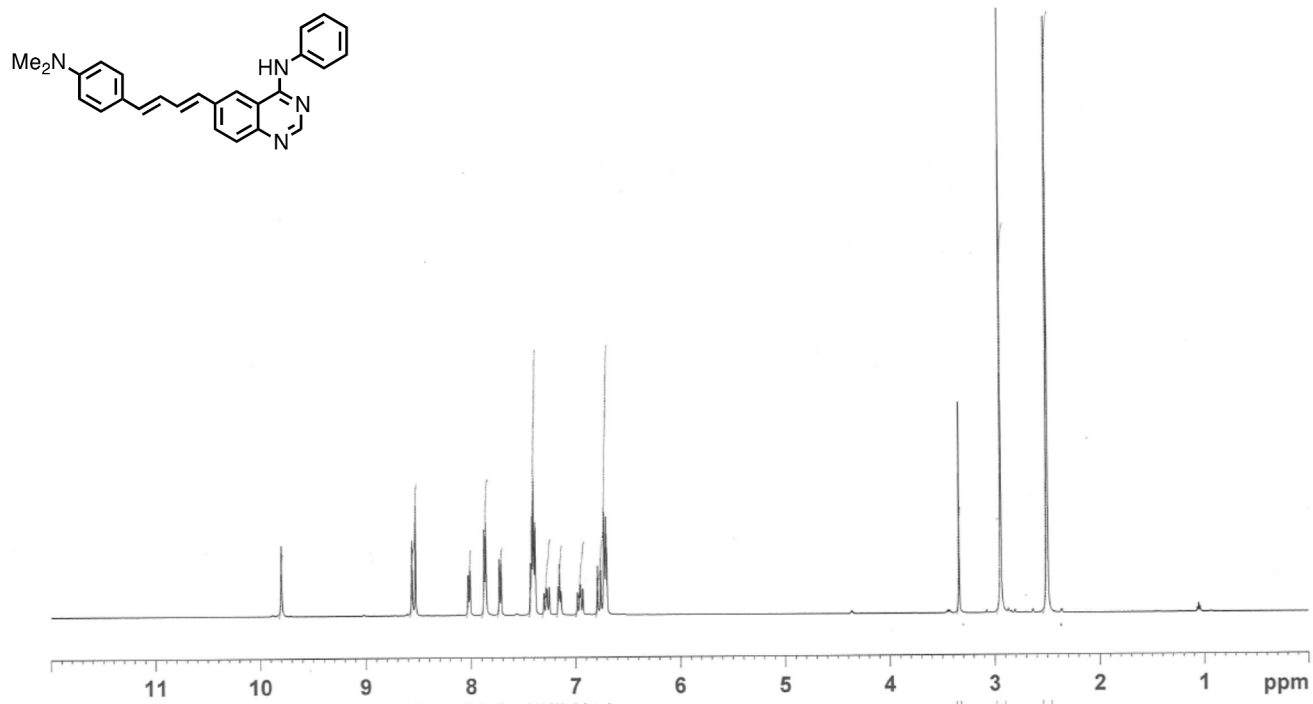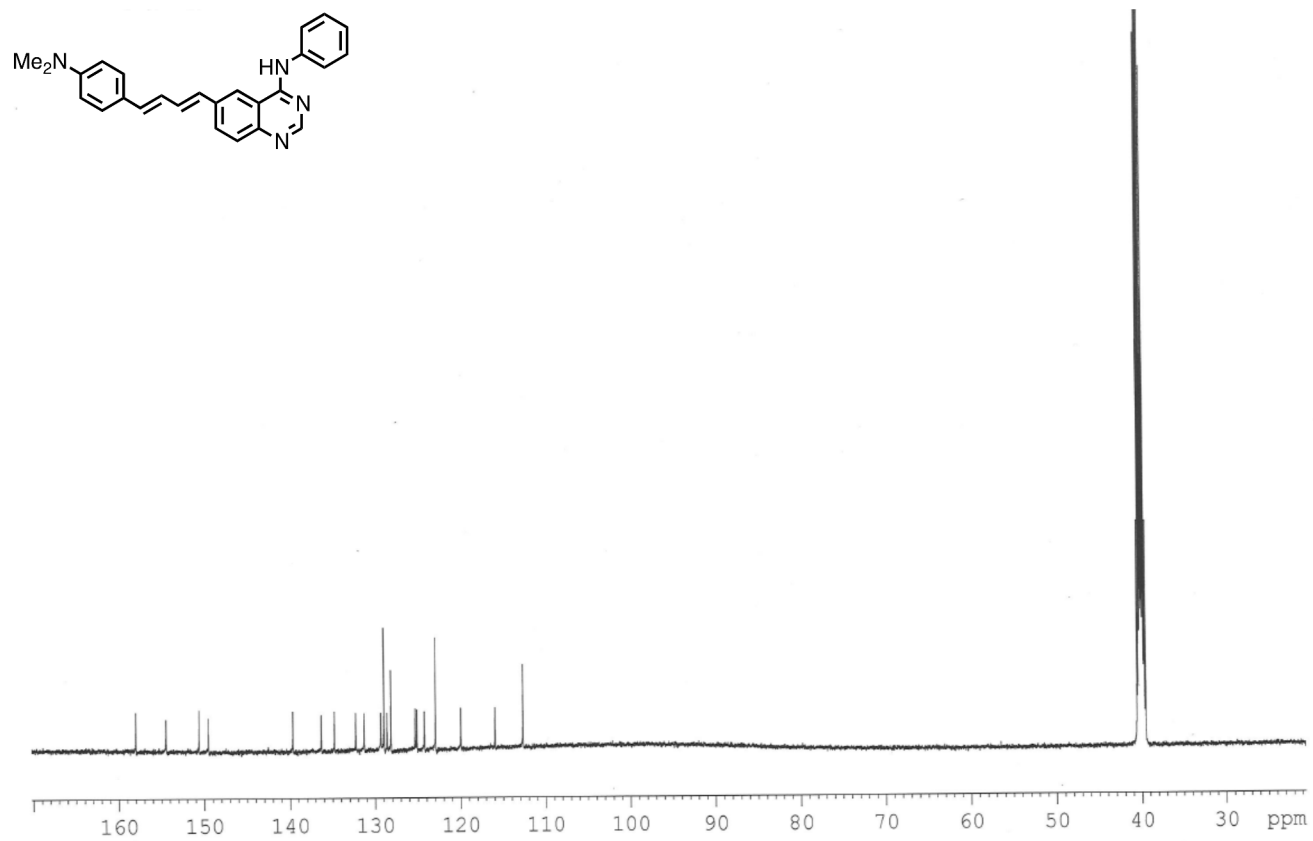

**Figure S11.**  $^1\text{H}$  (top) and  $^{13}\text{C}$  (bottom) NMRs of **3a**.

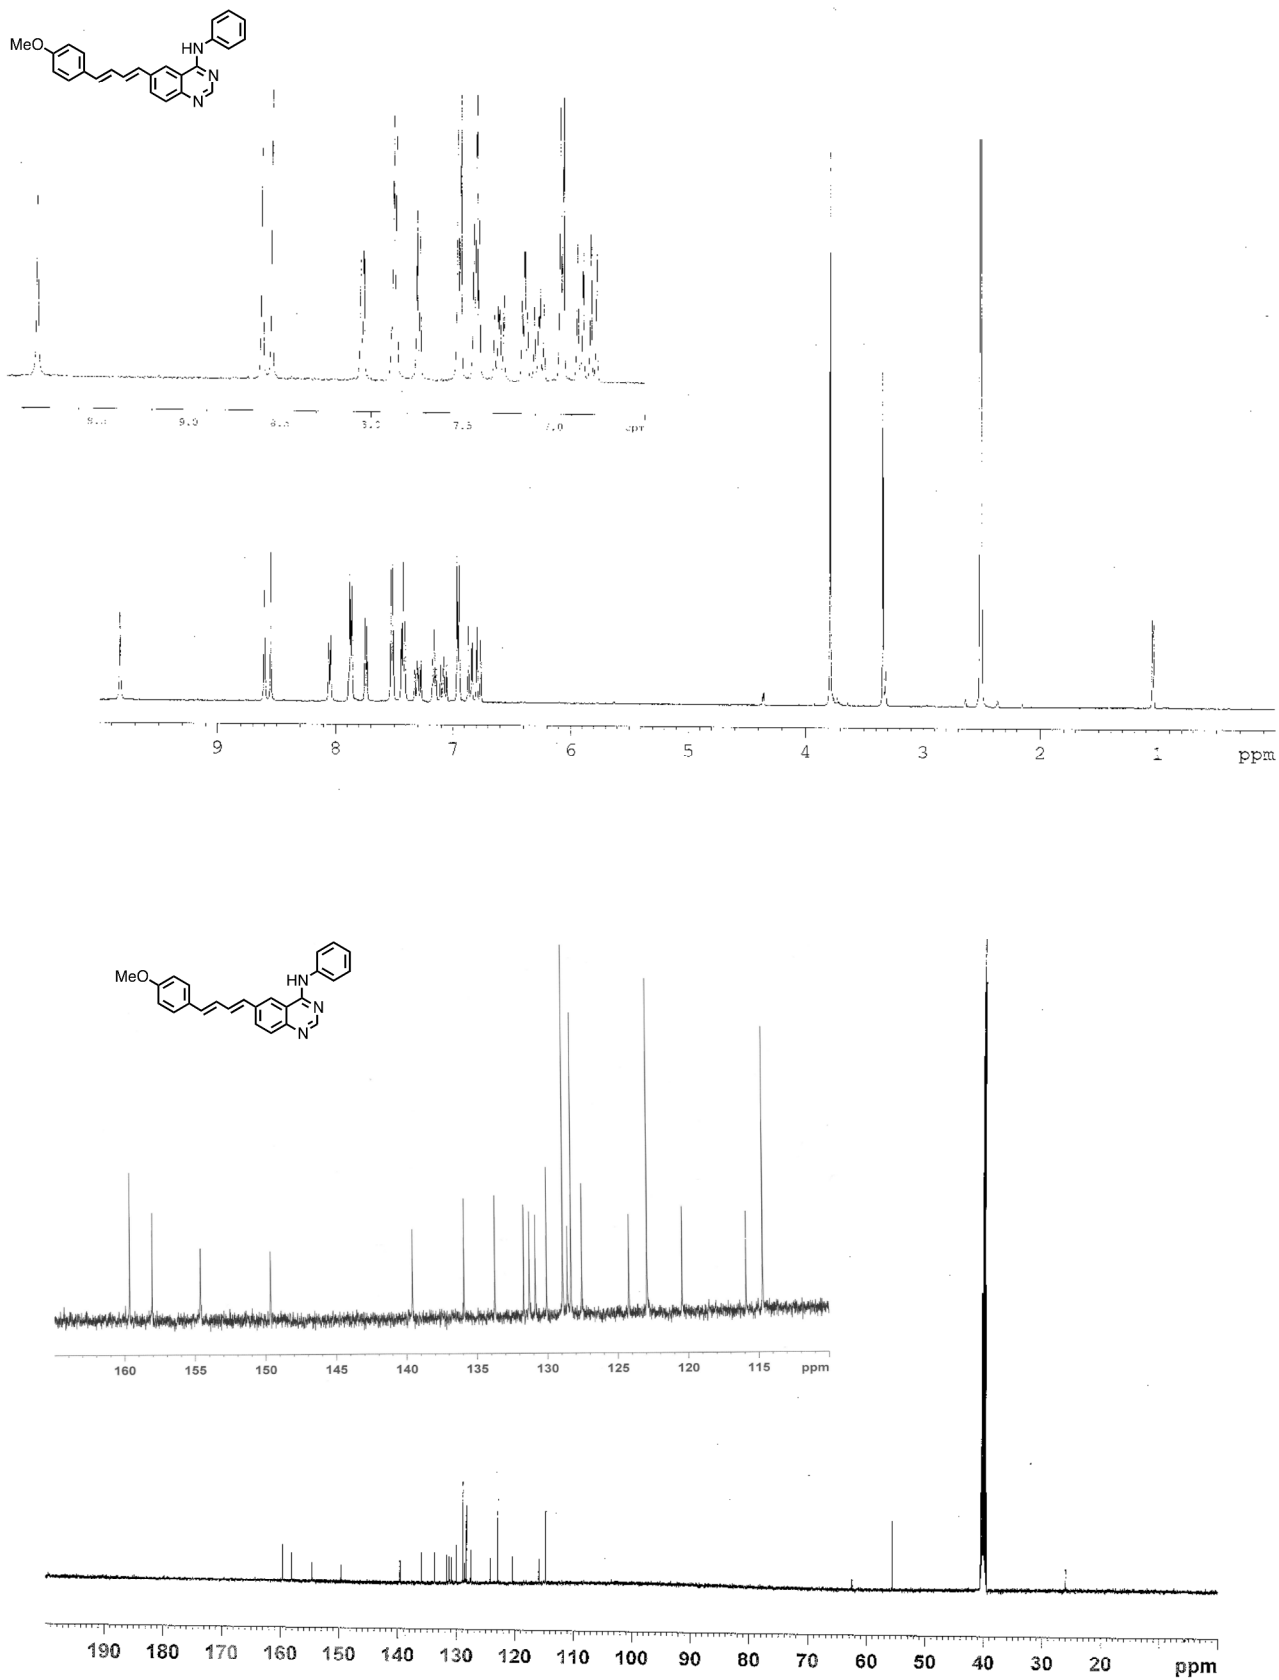

**Figure S12.**  $^1\text{H}$  (top) and  $^{13}\text{C}$  (bottom) NMRs of **3b**. (cocrystallized with isopropanol, 1.03 and 4.33 ppm in  $^1\text{H}$  spectrum and 27.0 and 62.4 ppm in  $^{13}\text{C}$  spectrum).

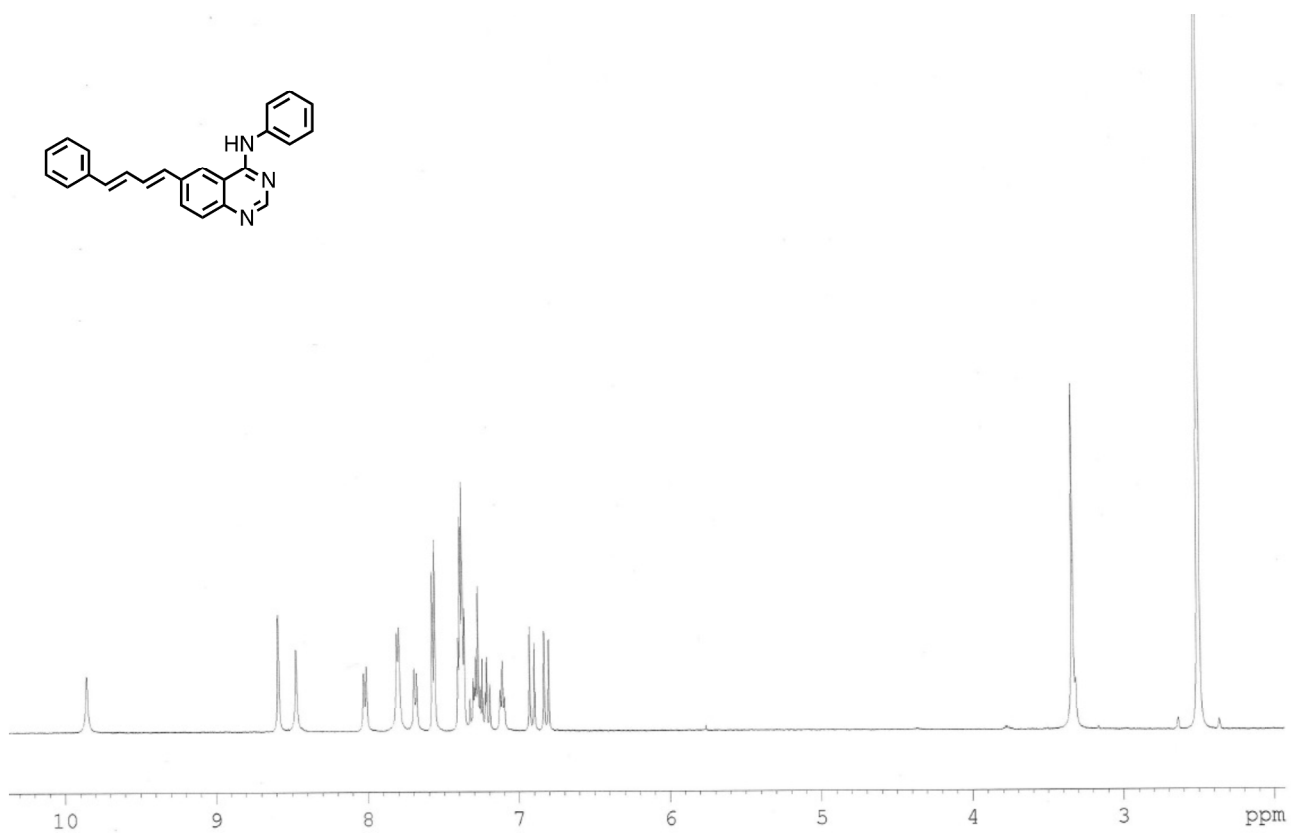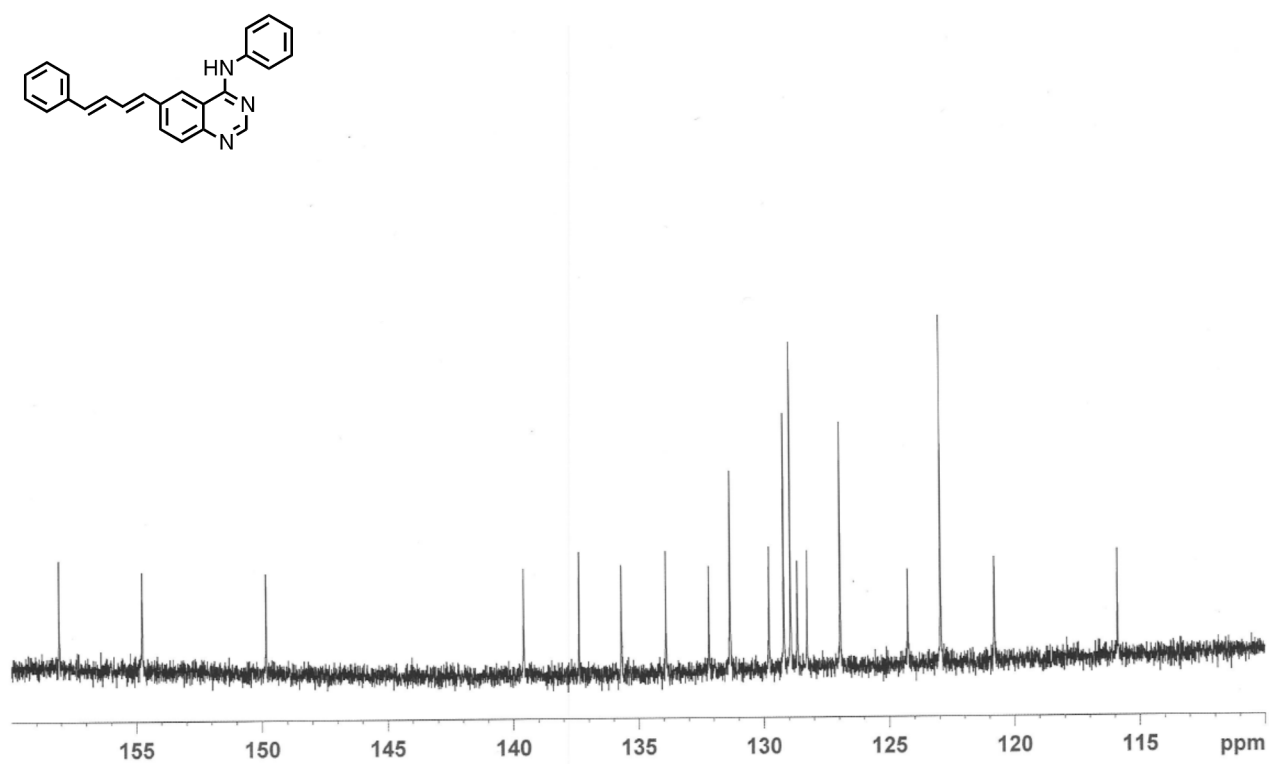

**Figure S13.**  $^1\text{H}$  (top) and  $^{13}\text{C}$  (bottom) NMRs of **3c**.

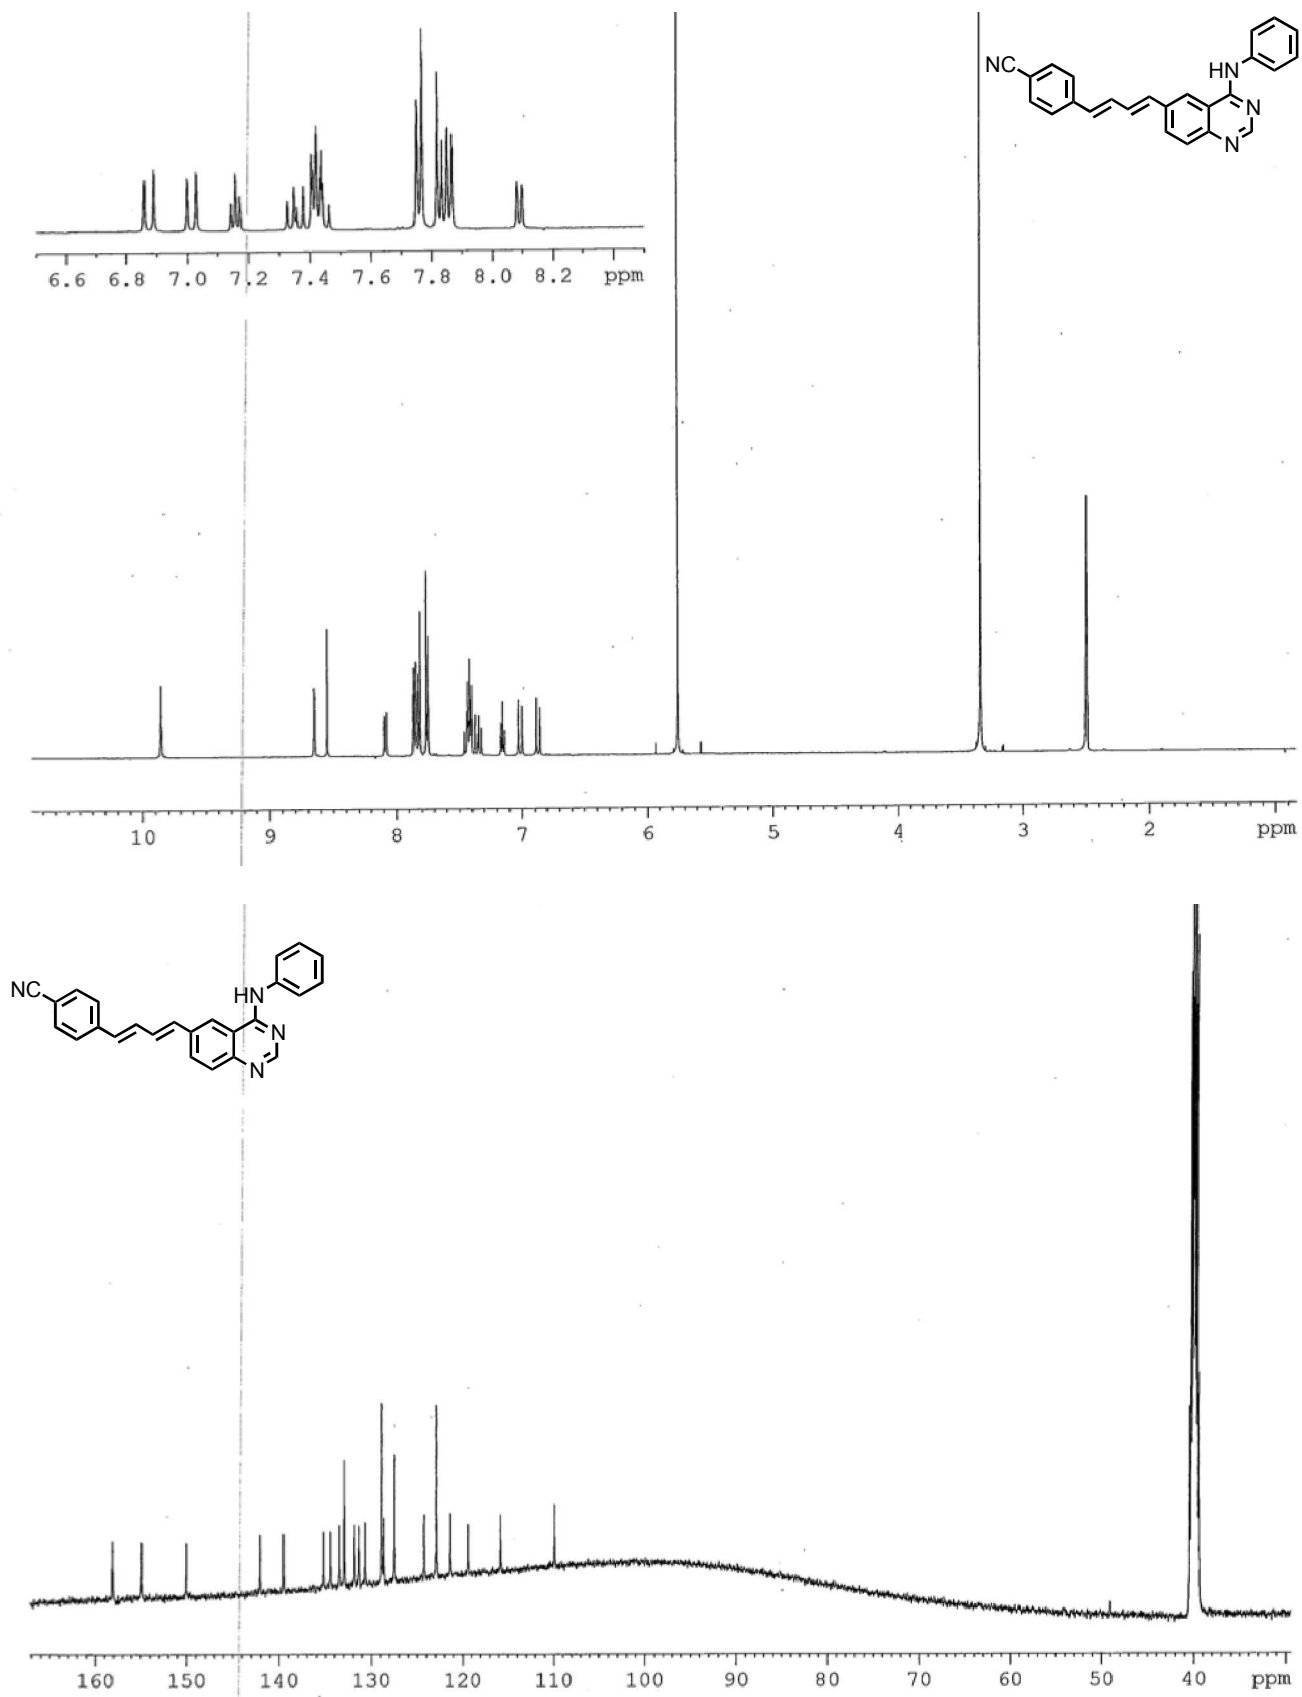

**Figure S14.**  $^1\text{H}$  (top) and  $^{13}\text{C}$  (bottom) NMRs of **3d**.

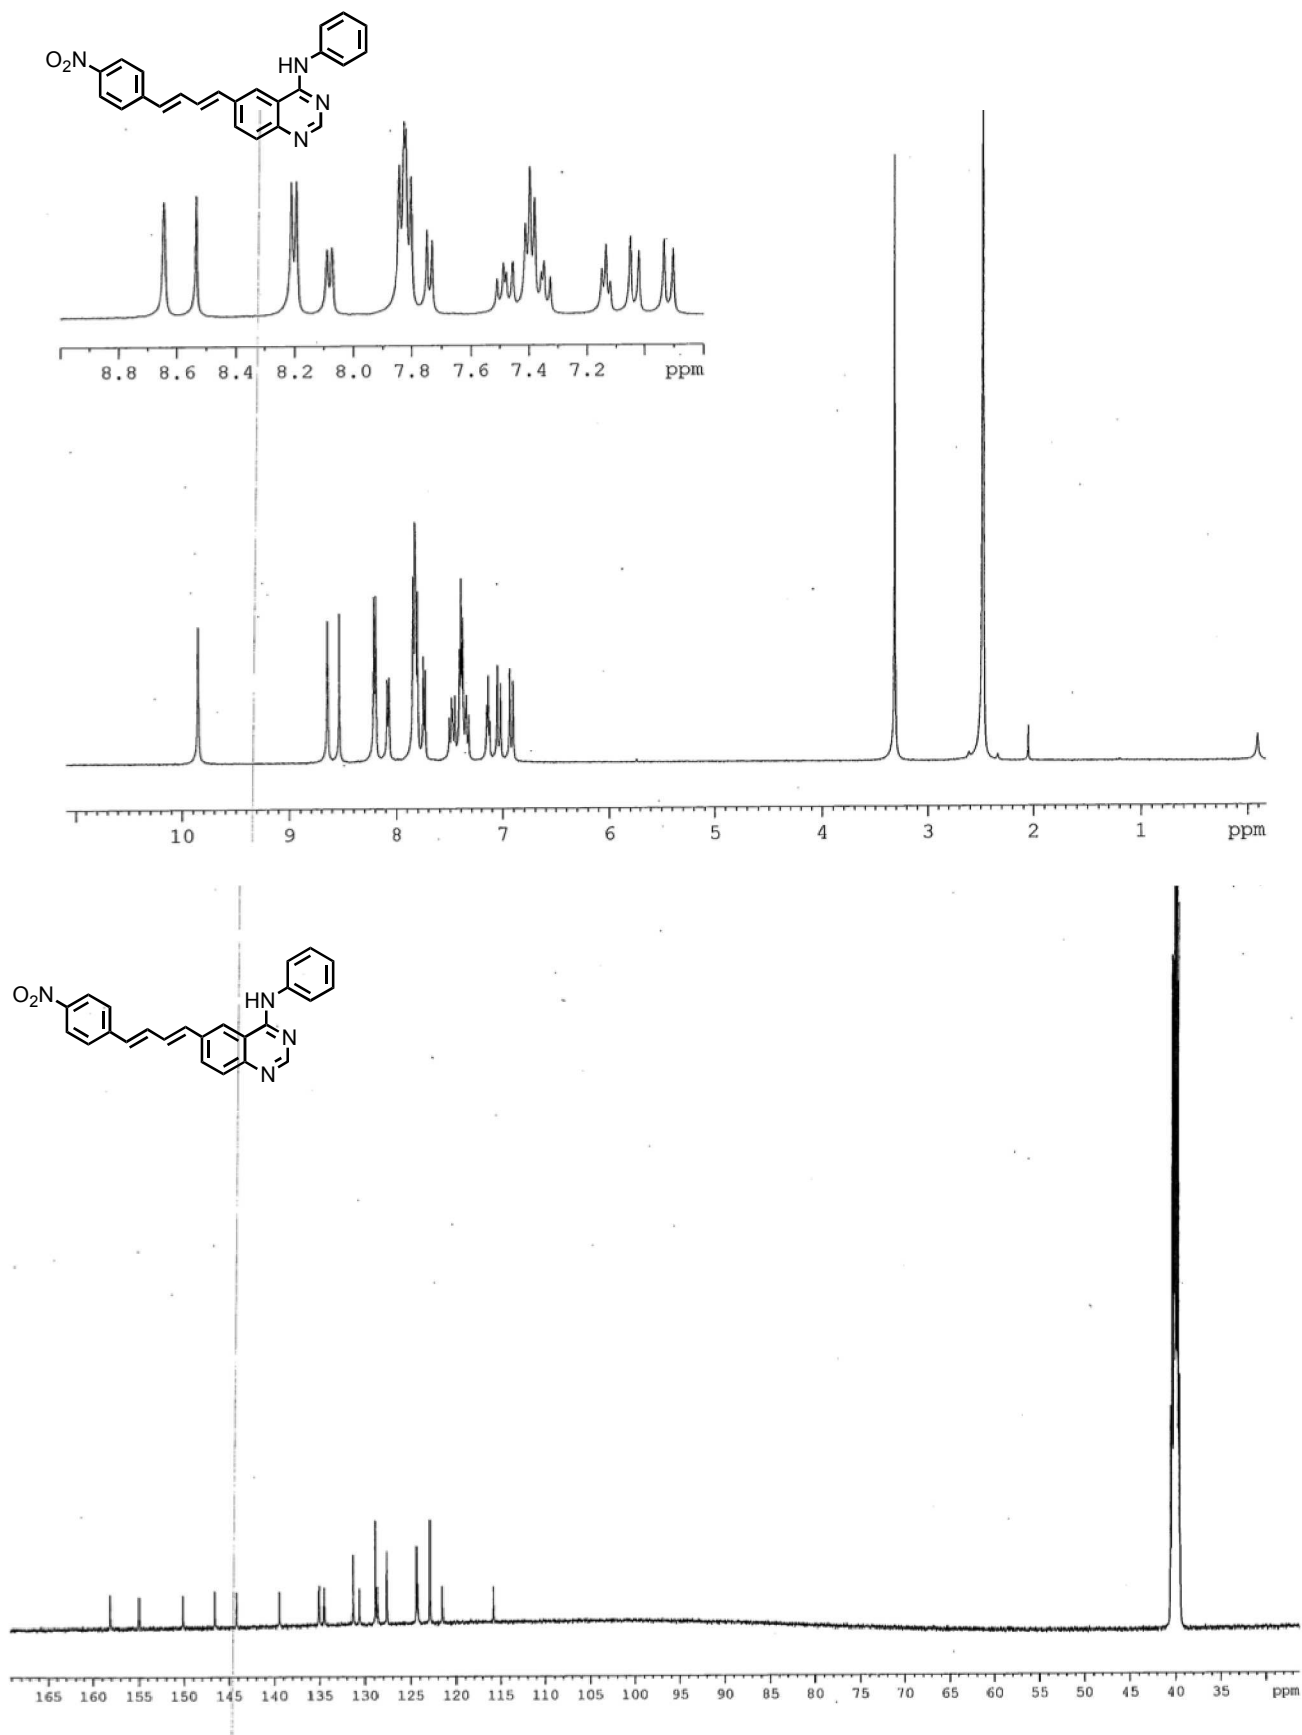

**Figure S15.**  $^1\text{H}$  (top) and  $^{13}\text{C}$  (bottom) NMRs of **3e**.



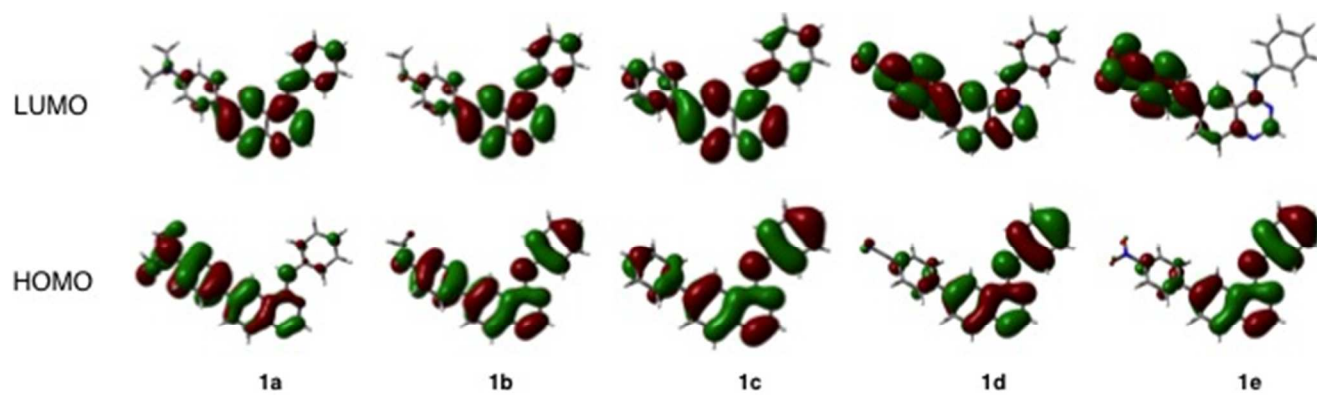

**Figure S16.** Frontier molecular orbitals of **1a-e** calculated at the CAM-B3LYP/6-31G\* level: the polarization of the HOMO and LUMO shifts across the series (compare **1a** and **1e**).

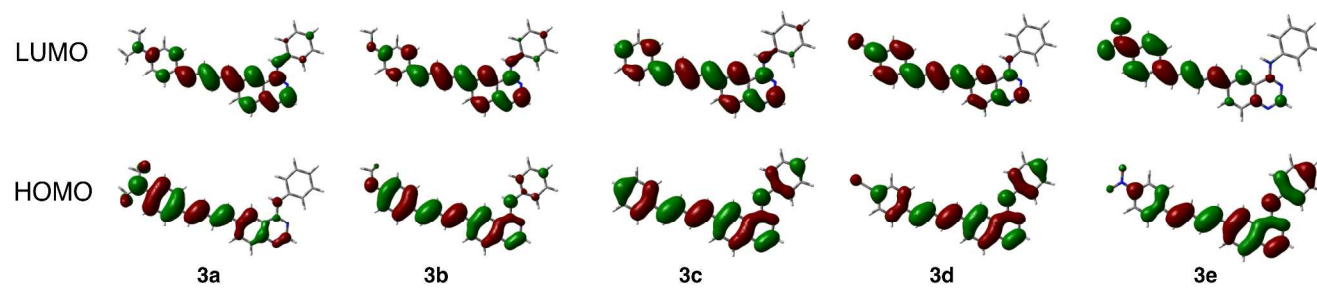

**Figure S17.** Frontier molecular orbitals of **3a-e** calculated at the CAM-B3LYP/6-31G\* level: the polarization of the HOMO and LUMO shifts across the series (compare **3a** and **3e**).

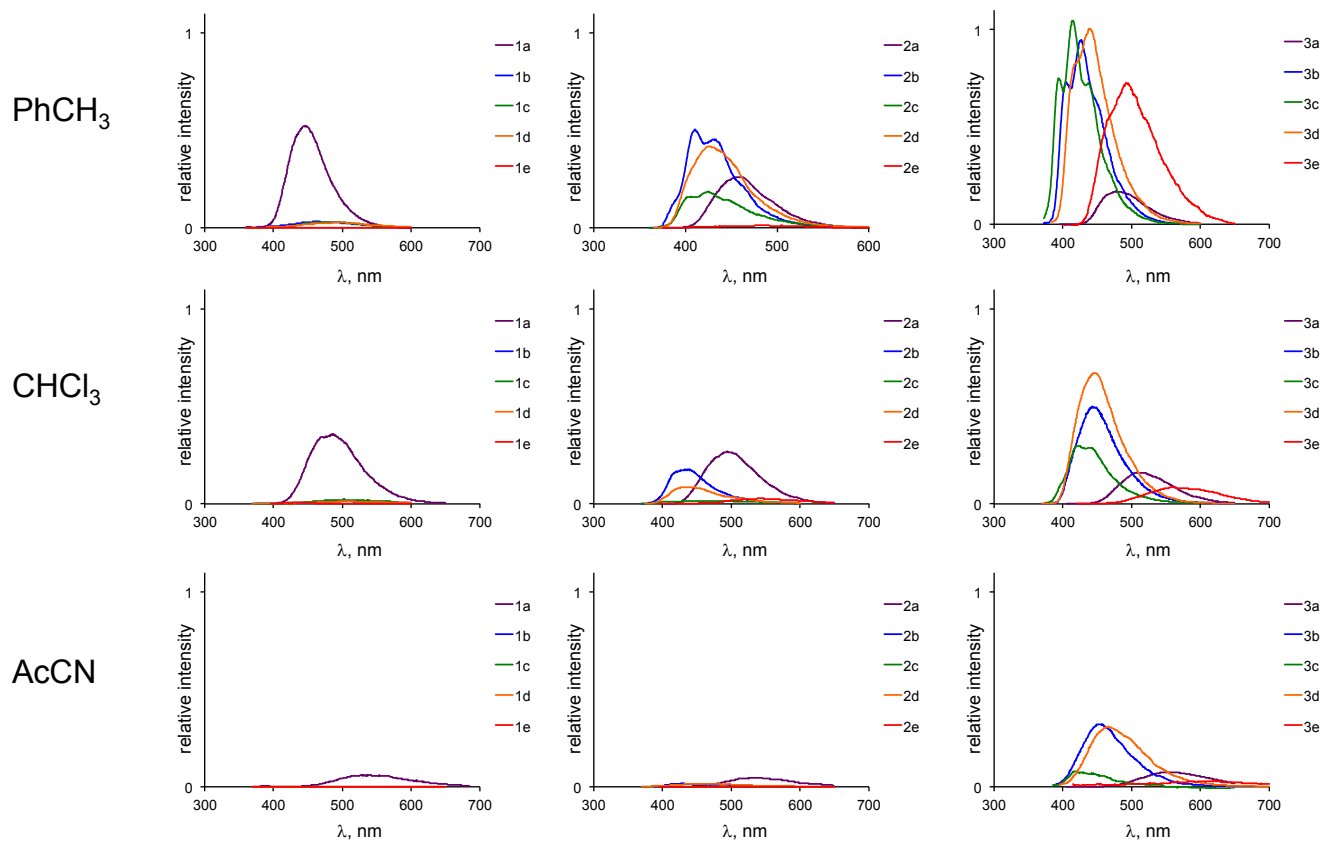

**Figure S18.** Emission spectra of **1a-3e** in toluene ( $E_T(30) = 33.9$  kcal/mol<sup>a</sup>), chloroform ( $E_T(30) = 39.1$  kcal/mol), and acetonitrile ( $E_T(30) = 46.0$  kcal/mol). With increasing polarity, emission intensity generally decreases along with a red shift in emission wavelengths.

<sup>a</sup> Reichardt, C. *Angew. Chem., Int. Ed.* **1979**, *18*, 98-110.

**Table S1:** Optimized geometry of **1a**; CAM-B3LYP/6-31G(d), SMD solvent model (CHCl<sub>3</sub>).

| atom | nucleus | x      | y      | z      |
|------|---------|--------|--------|--------|
| 1    | H       | 3.76   | -2.309 | -1.02  |
| 2    | C       | 3.717  | -1.337 | -0.546 |
| 3    | C       | 3.536  | 1.18   | 0.582  |
| 4    | C       | 2.53   | -0.627 | -0.599 |
| 5    | C       | 4.856  | -0.805 | 0.092  |
| 6    | C       | 4.733  | 0.485  | 0.644  |
| 7    | C       | 2.399  | 0.646  | -0.034 |
| 8    | H       | 1.688  | -1.07  | -1.123 |
| 9    | H       | 5.575  | 0.953  | 1.138  |
| 10   | H       | 3.487  | 2.16   | 1.047  |
| 11   | C       | 1.122  | 1.395  | -0.085 |
| 12   | H       | -0.092 | -0.336 | 0.081  |
| 13   | C       | -0.096 | 0.743  | -0.036 |
| 14   | C       | -0.054 | 3.52   | -0.21  |
| 15   | C       | -1.315 | 1.449  | -0.084 |
| 16   | C       | 1.116  | 2.81   | -0.182 |
| 17   | C       | -1.3   | 2.859  | -0.156 |
| 18   | C       | -2.629 | 0.845  | -0.047 |
| 19   | H       | 2.061  | 3.339  | -0.248 |
| 20   | H       | -0.058 | 4.603  | -0.28  |
| 21   | N       | -3.718 | 1.59   | -0.035 |
| 22   | C       | -3.562 | 2.93   | -0.088 |
| 23   | H       | -4.488 | 3.501  | -0.074 |
| 24   | N       | -2.449 | 3.604  | -0.164 |
| 25   | N       | -2.731 | -0.512 | -0.031 |
| 26   | H       | -1.86  | -1.013 | -0.131 |
| 27   | C       | -3.851 | -1.36  | 0.05   |
| 28   | C       | -5.929 | -3.234 | 0.219  |
| 29   | C       | -5.16  | -0.935 | 0.296  |
| 30   | C       | -3.597 | -2.728 | -0.11  |
| 31   | C       | -4.625 | -3.654 | -0.025 |
| 32   | C       | -6.181 | -1.877 | 0.377  |
| 33   | H       | -5.367 | 0.117  | 0.415  |
| 34   | H       | -2.58  | -3.061 | -0.303 |
| 35   | H       | -4.403 | -4.709 | -0.152 |
| 36   | H       | -7.193 | -1.532 | 0.569  |
| 37   | H       | -6.736 | -3.956 | 0.285  |
| 38   | N       | 6.035  | -1.519 | 0.178  |
| 39   | C       | 6.182  | -2.736 | -0.595 |
| 40   | H       | 5.418  | -3.471 | -0.319 |
| 41   | H       | 7.154  | -3.18  | -0.379 |
| 42   | H       | 6.115  | -2.564 | -1.679 |
| 43   | C       | 7.244  | -0.838 | 0.6    |
| 44   | H       | 7.138  | -0.436 | 1.613  |
| 45   | H       | 7.522  | -0.011 | -0.07  |
| 46   | H       | 8.066  | -1.553 | 0.619  |

**Table S2:** Optimized geometry of **1b**; CAM-B3LYP/6-31G(d), SMD solvent model (CHCl<sub>3</sub>).

| atom | nucleus | x      | y      | z      |
|------|---------|--------|--------|--------|
| 1    | H       | 4.098  | -2.407 | -1.095 |
| 2    | C       | 4.048  | -1.461 | -0.572 |
| 3    | C       | 3.877  | 0.991  | 0.728  |
| 4    | C       | 2.884  | -0.702 | -0.641 |
| 5    | C       | 5.136  | -0.986 | 0.159  |
| 6    | C       | 5.042  | 0.25   | 0.806  |
| 7    | C       | 2.768  | 0.53   | 0.004  |
| 8    | H       | 2.054  | -1.075 | -1.234 |
| 9    | H       | 5.894  | 0.604  | 1.377  |
| 10   | H       | 3.819  | 1.937  | 1.258  |
| 11   | C       | 1.514  | 1.317  | -0.059 |
| 12   | H       | 0.257  | -0.383 | 0.072  |
| 13   | C       | 0.28   | 0.697  | -0.032 |
| 14   | C       | 0.403  | 3.475  | -0.176 |
| 15   | C       | -0.918 | 1.438  | -0.083 |
| 16   | C       | 1.553  | 2.732  | -0.139 |
| 17   | C       | -0.861 | 2.847  | -0.142 |
| 18   | C       | -2.25  | 0.872  | -0.059 |
| 19   | H       | 2.516  | 3.231  | -0.184 |
| 20   | H       | 0.43   | 4.558  | -0.235 |
| 21   | N       | -3.316 | 1.649  | -0.048 |
| 22   | C       | -3.12  | 2.984  | -0.091 |
| 23   | H       | -4.029 | 3.583  | -0.081 |
| 24   | N       | -1.987 | 3.626  | -0.153 |
| 25   | N       | -2.392 | -0.481 | -0.053 |
| 26   | H       | -1.535 | -1.007 | -0.145 |
| 27   | C       | -3.537 | -1.298 | 0.025  |
| 28   | C       | -5.664 | -3.115 | 0.192  |
| 29   | C       | -4.84  | -0.835 | 0.222  |
| 30   | C       | -3.312 | -2.676 | -0.09  |
| 31   | C       | -4.365 | -3.573 | -0.006 |
| 32   | C       | -5.886 | -1.749 | 0.304  |
| 33   | H       | -5.024 | 0.225  | 0.306  |
| 34   | H       | -2.3   | -3.04  | -0.244 |
| 35   | H       | -4.165 | -4.637 | -0.096 |
| 36   | H       | -6.894 | -1.375 | 0.459  |
| 37   | H       | -6.49  | -3.816 | 0.258  |
| 38   | O       | 6.316  | -1.64  | 0.298  |
| 39   | C       | 6.449  | -2.919 | -0.297 |
| 40   | H       | 5.716  | -3.627 | 0.108  |
| 41   | H       | 7.454  | -3.263 | -0.05  |
| 42   | H       | 6.344  | -2.87  | -1.387 |

**Table S3:** Optimized geometry of **1c**; CAM-B3LYP/6-31G(d), SMD solvent model (CHCl<sub>3</sub>).

| atom | nucleus | x      | y      | z      |
|------|---------|--------|--------|--------|
| 1    | H       | 4.064  | -3.602 | -1.212 |
| 2    | C       | 4.218  | -2.672 | -0.672 |
| 3    | C       | 4.605  | -0.278 | 0.679  |
| 4    | C       | 3.235  | -1.69  | -0.7   |
| 5    | C       | 5.4    | -2.46  | 0.03   |
| 6    | C       | 5.589  | -1.259 | 0.705  |
| 7    | C       | 3.41   | -0.48  | -0.021 |
| 8    | H       | 2.33   | -1.857 | -1.275 |
| 9    | H       | 6.506  | -1.084 | 1.261  |
| 10   | H       | 4.758  | 0.646  | 1.229  |
| 11   | C       | 2.356  | 0.566  | -0.042 |
| 12   | H       | 0.761  | -0.823 | 0.062  |
| 13   | C       | 1.018  | 0.229  | -0.008 |
| 14   | C       | 1.741  | 2.914  | -0.119 |
| 15   | C       | 0.008  | 1.212  | -0.032 |
| 16   | C       | 2.703  | 1.939  | -0.097 |
| 17   | C       | 0.371  | 2.575  | -0.087 |
| 18   | C       | -1.416 | 0.95   | 0.003  |
| 19   | H       | 3.75   | 2.219  | -0.143 |
| 20   | H       | 2.002  | 3.965  | -0.17  |
| 21   | N       | -2.286 | 1.943  | -0.021 |
| 22   | C       | -1.804 | 3.202  | -0.08  |
| 23   | H       | -2.561 | 3.982  | -0.101 |
| 24   | N       | -0.557 | 3.582  | -0.113 |
| 25   | N       | -1.853 | -0.336 | 0.055  |
| 26   | H       | -1.129 | -1.041 | 0.069  |
| 27   | C       | -3.153 | -0.881 | 0.069  |
| 28   | C       | -5.637 | -2.182 | 0.095  |
| 29   | C       | -4.335 | -0.136 | 0.07   |
| 30   | C       | -3.23  | -2.28  | 0.084  |
| 31   | C       | -4.457 | -2.922 | 0.097  |
| 32   | C       | -5.56  | -0.795 | 0.082  |
| 33   | H       | -4.286 | 0.942  | 0.059  |
| 34   | H       | -2.314 | -2.866 | 0.084  |
| 35   | H       | -4.491 | -4.007 | 0.107  |
| 36   | H       | -6.471 | -0.202 | 0.082  |
| 37   | H       | -6.6   | -2.681 | 0.105  |
| 38   | H       | 6.169  | -3.226 | 0.049  |

**Table S4:** Optimized geometry of **1d**; CAM-B3LYP/6-31G(d), SMD solvent model (CHCl<sub>3</sub>).

| atom | nucleus | x      | y      | z      |
|------|---------|--------|--------|--------|
| 1    | H       | -4.106 | -2.626 | 1.247  |
| 2    | C       | -4.077 | -1.69  | 0.701  |
| 3    | C       | -4.026 | 0.725  | -0.683 |
| 4    | C       | -2.948 | -0.889 | 0.741  |
| 5    | C       | -5.19  | -1.28  | -0.039 |
| 6    | C       | -5.162 | -0.065 | -0.73  |
| 7    | C       | -2.901 | 0.326  | 0.049  |
| 8    | H       | -2.097 | -1.201 | 1.337  |
| 9    | H       | -6.024 | 0.248  | -1.308 |
| 10   | H       | -4.005 | 1.655  | -1.24  |
| 11   | C       | -1.682 | 1.17   | 0.08   |
| 12   | H       | -0.361 | -0.481 | -0.051 |
| 13   | C       | -0.426 | 0.598  | 0.039  |
| 14   | C       | -0.667 | 3.372  | 0.155  |
| 15   | C       | 0.74   | 1.39   | 0.059  |
| 16   | C       | -1.786 | 2.581  | 0.142  |
| 17   | C       | 0.621  | 2.796  | 0.106  |
| 18   | C       | 2.095  | 0.881  | 0.021  |
| 19   | H       | -2.769 | 3.039  | 0.195  |
| 20   | H       | -0.738 | 4.453  | 0.204  |
| 21   | N       | 3.125  | 1.706  | -0.011 |
| 22   | C       | 2.871  | 3.03   | 0.023  |
| 23   | H       | 3.752  | 3.667  | -0.005 |
| 24   | N       | 1.711  | 3.624  | 0.094  |
| 25   | N       | 2.296  | -0.462 | 0.024  |
| 26   | H       | 1.462  | -1.023 | 0.118  |
| 27   | C       | 3.474  | -1.232 | -0.035 |
| 28   | C       | 5.677  | -2.96  | -0.147 |
| 29   | C       | 4.762  | -0.715 | -0.198 |
| 30   | C       | 3.303  | -2.619 | 0.07   |
| 31   | C       | 4.393  | -3.472 | 0.015  |
| 32   | C       | 5.846  | -1.585 | -0.252 |
| 33   | H       | 4.904  | 0.352  | -0.276 |
| 34   | H       | 2.302  | -3.026 | 0.195  |
| 35   | H       | 4.236  | -4.543 | 0.098  |
| 36   | H       | 6.842  | -1.17  | -0.379 |
| 37   | H       | 6.533  | -3.626 | -0.191 |
| 38   | C       | -6.363 | -2.103 | -0.085 |
| 39   | N       | -7.311 | -2.765 | -0.125 |

**Table S5:** Optimized geometry of **1e**; CAM-B3LYP/6-31G(d), SMD solvent model (CHCl<sub>3</sub>).

| atom | nucleus | x      | y      | z      |
|------|---------|--------|--------|--------|
| 1    | H       | 3.911  | -2.266 | -1.276 |
| 2    | C       | 3.807  | -1.339 | -0.727 |
| 3    | C       | 3.6    | 1.055  | 0.687  |
| 4    | C       | 2.633  | -0.606 | -0.767 |
| 5    | C       | 4.866  | -0.856 | 0.028  |
| 6    | C       | 4.782  | 0.335  | 0.736  |
| 7    | C       | 2.508  | 0.597  | -0.06  |
| 8    | H       | 1.807  | -0.96  | -1.374 |
| 9    | H       | 5.627  | 0.679  | 1.319  |
| 10   | H       | 3.518  | 1.975  | 1.256  |
| 11   | C       | 1.241  | 1.366  | -0.095 |
| 12   | H       | 0.017  | -0.361 | 0.017  |
| 13   | C       | 0.021  | 0.72   | -0.065 |
| 14   | C       | 0.099  | 3.504  | -0.173 |
| 15   | C       | -1.189 | 1.442  | -0.089 |
| 16   | C       | 1.262  | 2.781  | -0.153 |
| 17   | C       | -1.154 | 2.853  | -0.134 |
| 18   | C       | -2.51  | 0.852  | -0.054 |
| 19   | H       | 2.216  | 3.297  | -0.197 |
| 20   | H       | 0.105  | 4.587  | -0.219 |
| 21   | N       | -3.588 | 1.613  | -0.026 |
| 22   | C       | -3.414 | 2.951  | -0.062 |
| 23   | H       | -4.331 | 3.534  | -0.04  |
| 24   | N       | -2.292 | 3.613  | -0.128 |
| 25   | N       | -2.631 | -0.501 | -0.052 |
| 26   | H       | -1.769 | -1.017 | -0.151 |
| 27   | C       | -3.764 | -1.335 | 0.038  |
| 28   | C       | -5.861 | -3.184 | 0.228  |
| 29   | C       | -5.068 | -0.892 | 0.271  |
| 30   | C       | -3.522 | -2.708 | -0.1   |
| 31   | C       | -4.56  | -3.621 | -0.005 |
| 32   | C       | -6.1   | -1.822 | 0.363  |
| 33   | H       | -5.265 | 0.164  | 0.373  |
| 34   | H       | -2.509 | -3.055 | -0.283 |
| 35   | H       | -4.349 | -4.681 | -0.114 |
| 36   | H       | -7.109 | -1.464 | 0.546  |
| 37   | H       | -6.676 | -3.897 | 0.303  |
| 38   | N       | 6.108  | -1.622 | 0.077  |
| 39   | O       | 6.16   | -2.674 | -0.547 |
| 40   | O       | 7.035  | -1.176 | 0.739  |

**Table S6:** Optimized geometry of **2a**; CAM-B3LYP/6-31G(d), SMD solvent model (CHCl<sub>3</sub>).

| atom | nucleus | x      | y      | z      |
|------|---------|--------|--------|--------|
| 1    | H       | 5.147  | 2.549  | -0.051 |
| 2    | C       | 5.123  | 1.466  | -0.045 |
| 3    | C       | 4.979  | -1.291 | -0.009 |
| 4    | C       | 3.895  | 0.832  | -0.031 |
| 5    | C       | 6.328  | 0.73   | -0.053 |
| 6    | C       | 6.219  | -0.675 | -0.021 |
| 7    | C       | 3.782  | -0.566 | -0.016 |
| 8    | H       | 3.002  | 1.45   | -0.029 |
| 9    | H       | 7.108  | -1.292 | -0.008 |
| 10   | H       | 4.938  | -2.377 | 0.011  |
| 11   | C       | 0.005  | -1.479 | -0.003 |
| 12   | H       | -1.098 | 0.326  | -0.006 |
| 13   | C       | -1.175 | -0.757 | -0.002 |
| 14   | C       | -1.294 | -3.533 | 0.007  |
| 15   | C       | -2.435 | -1.388 | 0.003  |
| 16   | C       | -0.083 | -2.897 | 0.001  |
| 17   | C       | -2.502 | -2.797 | 0.007  |
| 18   | C       | -3.711 | -0.705 | 0.004  |
| 19   | H       | 0.824  | -3.492 | 0      |
| 20   | H       | -1.363 | -4.616 | 0.01   |
| 21   | N       | -4.842 | -1.386 | 0.008  |
| 22   | C       | -4.765 | -2.733 | 0.012  |
| 23   | H       | -5.723 | -3.247 | 0.015  |
| 24   | N       | -3.691 | -3.474 | 0.012  |
| 25   | C       | 1.278  | -0.752 | -0.011 |
| 26   | H       | 1.173  | 0.331  | -0.024 |
| 27   | C       | 2.509  | -1.286 | -0.005 |
| 28   | H       | 2.612  | -2.37  | 0.009  |
| 29   | N       | -3.733 | 0.654  | 0.001  |
| 30   | H       | -2.828 | 1.101  | -0.001 |
| 31   | C       | -4.796 | 1.576  | 0.001  |
| 32   | C       | -6.746 | 3.589  | 0      |
| 33   | C       | -6.152 | 1.238  | 0.002  |
| 34   | C       | -4.429 | 2.928  | 0      |
| 35   | C       | -5.394 | 3.923  | 0      |
| 36   | C       | -7.109 | 2.249  | 0.001  |
| 37   | H       | -6.443 | 0.199  | 0.003  |
| 38   | H       | -3.375 | 3.195  | -0.001 |
| 39   | H       | -5.086 | 4.964  | -0.001 |
| 40   | H       | -8.159 | 1.972  | 0.002  |
| 41   | H       | -7.504 | 4.366  | 0      |
| 42   | N       | 7.553  | 1.356  | -0.096 |
| 43   | C       | 7.63   | 2.794  | 0.071  |
| 44   | H       | 7.07   | 3.315  | -0.713 |
| 45   | H       | 8.672  | 3.106  | -0.009 |
| 46   | H       | 7.246  | 3.129  | 1.045  |
| 47   | C       | 8.76   | 0.573  | 0.076  |
| 48   | H       | 8.848  | -0.192 | -0.704 |
| 49   | H       | 8.804  | 0.07   | 1.052  |
| 50   | H       | 9.626  | 1.23   | -0.008 |



**Table S7:** Optimized geometry of **2b**; CAM-B3LYP/6-31G(d), SMD solvent model (CHCl<sub>3</sub>).

| atom | nucleus | x      | y      | z      |
|------|---------|--------|--------|--------|
| 1    | H       | -5.502 | 2.666  | 0.063  |
| 2    | C       | -5.484 | 1.583  | 0.03   |
| 3    | C       | -5.385 | -1.188 | -0.054 |
| 4    | C       | -4.262 | 0.923  | 0.023  |
| 5    | C       | -6.67  | 0.847  | -0.006 |
| 6    | C       | -6.61  | -0.548 | -0.049 |
| 7    | C       | -4.179 | -0.472 | -0.018 |
| 8    | H       | -3.357 | 1.522  | 0.053  |
| 9    | H       | -7.538 | -1.109 | -0.077 |
| 10   | H       | -5.356 | -2.274 | -0.086 |
| 11   | C       | -0.415 | -1.444 | -0.001 |
| 12   | H       | 0.712  | 0.345  | 0.017  |
| 13   | C       | 0.774  | -0.738 | 0.009  |
| 14   | C       | 0.854  | -3.516 | -0.011 |
| 15   | C       | 2.025  | -1.386 | 0.009  |
| 16   | C       | -0.348 | -2.863 | -0.011 |
| 17   | C       | 2.072  | -2.796 | 0      |
| 18   | C       | 3.31   | -0.722 | 0.015  |
| 19   | H       | -1.263 | -3.446 | -0.018 |
| 20   | H       | 0.908  | -4.599 | -0.017 |
| 21   | N       | 4.431  | -1.418 | 0.018  |
| 22   | C       | 4.335  | -2.764 | 0.011  |
| 23   | H       | 5.286  | -3.292 | 0.014  |
| 24   | N       | 3.251  | -3.491 | 0.001  |
| 25   | C       | -1.678 | -0.699 | 0      |
| 26   | H       | -1.558 | 0.382  | 0.019  |
| 27   | C       | -2.915 | -1.216 | -0.022 |
| 28   | H       | -3.035 | -2.297 | -0.044 |
| 29   | N       | 3.352  | 0.638  | 0.018  |
| 30   | H       | 2.455  | 1.099  | 0.009  |
| 31   | C       | 4.433  | 1.541  | 0.005  |
| 32   | C       | 6.419  | 3.518  | -0.022 |
| 33   | C       | 5.781  | 1.18   | 0.074  |
| 34   | C       | 4.092  | 2.897  | -0.079 |
| 35   | C       | 5.075  | 3.874  | -0.091 |
| 36   | C       | 6.756  | 2.173  | 0.058  |
| 37   | H       | 6.053  | 0.138  | 0.135  |
| 38   | H       | 3.044  | 3.181  | -0.139 |
| 39   | H       | 4.786  | 4.918  | -0.156 |
| 40   | H       | 7.8    | 1.879  | 0.112  |
| 41   | H       | 7.191  | 4.281  | -0.033 |
| 42   | O       | -7.912 | 1.39   | -0.003 |
| 43   | C       | -8.03  | 2.8    | 0.07   |
| 44   | H       | -7.585 | 3.194  | 0.991  |
| 45   | H       | -9.1   | 3.013  | 0.072  |
| 46   | H       | -7.568 | 3.288  | -0.795 |

**Table S8:** Optimized geometry of **2c**; CAM-B3LYP/6-31G(d), SMD solvent model (CHCl<sub>3</sub>).

| atom | nucleus | x      | y      | z      |
|------|---------|--------|--------|--------|
| 1    | H       | 5.857  | -3.676 | 0.057  |
| 2    | C       | 5.961  | -2.595 | 0.044  |
| 3    | C       | 6.211  | 0.164  | 0.01   |
| 4    | C       | 4.826  | -1.798 | 0.027  |
| 5    | C       | 7.229  | -2.018 | 0.044  |
| 6    | C       | 7.349  | -0.633 | 0.027  |
| 7    | C       | 4.93   | -0.4   | 0.01   |
| 8    | H       | 3.848  | -2.27  | 0.027  |
| 9    | H       | 8.331  | -0.17  | 0.027  |
| 10   | H       | 6.311  | 1.246  | -0.004 |
| 11   | C       | 1.323  | 1.045  | -0.021 |
| 12   | H       | -0.037 | -0.576 | 0.033  |
| 13   | C       | 0.049  | 0.506  | -0.005 |
| 14   | C       | 0.35   | 3.271  | -0.056 |
| 15   | C       | -1.101 | 1.321  | -0.018 |
| 16   | C       | 1.451  | 2.459  | -0.053 |
| 17   | C       | -0.954 | 2.724  | -0.032 |
| 18   | C       | -2.466 | 0.841  | -0.01  |
| 19   | H       | 2.438  | 2.907  | -0.069 |
| 20   | H       | 0.446  | 4.351  | -0.071 |
| 21   | N       | -3.48  | 1.686  | 0.027  |
| 22   | C       | -3.198 | 3.005  | 0.027  |
| 23   | H       | -4.066 | 3.661  | 0.058  |
| 24   | N       | -2.025 | 3.575  | -0.013 |
| 25   | C       | 2.477  | 0.141  | -0.002 |
| 26   | H       | 2.217  | -0.915 | 0.019  |
| 27   | C       | 3.769  | 0.499  | -0.008 |
| 28   | H       | 4.027  | 1.555  | -0.027 |
| 29   | N       | -2.695 | -0.499 | -0.042 |
| 30   | H       | -1.871 | -1.073 | -0.145 |
| 31   | C       | -3.89  | -1.243 | -0.016 |
| 32   | C       | -6.134 | -2.922 | 0.028  |
| 33   | C       | -5.167 | -0.702 | 0.155  |
| 34   | C       | -3.75  | -2.63  | -0.16  |
| 35   | C       | -4.86  | -3.458 | -0.139 |
| 36   | C       | -6.272 | -1.548 | 0.174  |
| 37   | H       | -5.285 | 0.365  | 0.264  |
| 38   | H       | -2.758 | -3.057 | -0.29  |
| 39   | H       | -4.727 | -4.53  | -0.255 |
| 40   | H       | -7.258 | -1.113 | 0.306  |
| 41   | H       | -7.005 | -3.569 | 0.044  |
| 42   | H       | 8.115  | -2.645 | 0.058  |

**Table S9:** Optimized geometry of **2d**; CAM-B3LYP/6-31G(d), SMD solvent model (CHCl<sub>3</sub>).

| atom | nucleus | x      | y      | z      |
|------|---------|--------|--------|--------|
| 1    | H       | -5.567 | 2.896  | -0.307 |
| 2    | C       | -5.558 | 1.821  | -0.17  |
| 3    | C       | -5.55  | -0.935 | 0.172  |
| 4    | C       | -4.362 | 1.128  | -0.175 |
| 5    | C       | -6.765 | 1.133  | 0.008  |
| 6    | C       | -6.755 | -0.253 | 0.179  |
| 7    | C       | -4.332 | -0.264 | 0      |
| 8    | H       | -3.441 | 1.68   | -0.322 |
| 9    | H       | -7.688 | -0.788 | 0.315  |
| 10   | H       | -5.548 | -2.012 | 0.306  |
| 11   | C       | -0.606 | -1.344 | -0.04  |
| 12   | H       | 0.571  | 0.411  | -0.032 |
| 13   | C       | 0.603  | -0.674 | -0.03  |
| 14   | C       | 0.594  | -3.453 | -0.029 |
| 15   | C       | 1.834  | -1.36  | -0.016 |
| 16   | C       | -0.586 | -2.764 | -0.042 |
| 17   | C       | 1.833  | -2.772 | -0.015 |
| 18   | C       | 3.141  | -0.739 | -0.003 |
| 19   | H       | -1.52  | -3.315 | -0.059 |
| 20   | H       | 0.616  | -4.537 | -0.032 |
| 21   | N       | 4.238  | -1.473 | 0.007  |
| 22   | C       | 4.093  | -2.814 | 0.006  |
| 23   | H       | 5.025  | -3.376 | 0.015  |
| 24   | N       | 2.986  | -3.506 | -0.003 |
| 25   | C       | -1.846 | -0.565 | -0.05  |
| 26   | H       | -1.697 | 0.511  | -0.104 |
| 27   | C       | -3.094 | -1.05  | 0.01   |
| 28   | H       | -3.246 | -2.123 | 0.083  |
| 29   | N       | 3.23   | 0.618  | 0      |
| 30   | H       | 2.35   | 1.109  | -0.002 |
| 31   | C       | 4.344  | 1.483  | 0.014  |
| 32   | C       | 6.406  | 3.38   | 0.039  |
| 33   | C       | 5.678  | 1.067  | -0.008 |
| 34   | C       | 4.056  | 2.852  | 0.049  |
| 35   | C       | 5.076  | 3.79   | 0.061  |
| 36   | C       | 6.691  | 2.021  | 0.005  |
| 37   | H       | 5.906  | 0.013  | -0.034 |
| 38   | H       | 3.02   | 3.184  | 0.068  |
| 39   | H       | 4.828  | 4.846  | 0.088  |
| 40   | H       | 7.723  | 1.684  | -0.013 |
| 41   | H       | 7.207  | 4.111  | 0.048  |
| 42   | C       | -8.006 | 1.851  | 0.012  |
| 43   | N       | -9.007 | 2.431  | 0.015  |

**Table S10:** Optimized geometry of **2e**; CAM-B3LYP/6-31G(d), SMD solvent model (CHCl<sub>3</sub>).

| atom | nucleus | x      | y      | z |
|------|---------|--------|--------|---|
| 1    | H       | -5.199 | 2.626  | 0 |
| 2    | C       | -5.153 | 1.545  | 0 |
| 3    | C       | -5.093 | -1.236 | 0 |
| 4    | C       | -3.941 | 0.88   | 0 |
| 5    | C       | -6.328 | 0.801  | 0 |
| 6    | C       | -6.315 | -0.586 | 0 |
| 7    | C       | -3.884 | -0.523 | 0 |
| 8    | H       | -3.03  | 1.467  | 0 |
| 9    | H       | -7.246 | -1.139 | 0 |
| 10   | H       | -5.069 | -2.321 | 0 |
| 11   | C       | -0.126 | -1.489 | 0 |
| 12   | H       | 0.975  | 0.318  | 0 |
| 13   | C       | 1.052  | -0.765 | 0 |
| 14   | C       | 1.167  | -3.542 | 0 |
| 15   | C       | 2.311  | -1.396 | 0 |
| 16   | C       | -0.044 | -2.906 | 0 |
| 17   | C       | 2.374  | -2.805 | 0 |
| 18   | C       | 3.587  | -0.713 | 0 |
| 19   | H       | -0.952 | -3.5   | 0 |
| 20   | H       | 1.236  | -4.625 | 0 |
| 21   | N       | 4.717  | -1.396 | 0 |
| 22   | C       | 4.637  | -2.742 | 0 |
| 23   | H       | 5.594  | -3.259 | 0 |
| 24   | N       | 3.562  | -3.484 | 0 |
| 25   | C       | -1.395 | -0.756 | 0 |
| 26   | H       | -1.282 | 0.325  | 0 |
| 27   | C       | -2.628 | -1.281 | 0 |
| 28   | H       | -2.753 | -2.36  | 0 |
| 29   | N       | 3.612  | 0.645  | 0 |
| 30   | H       | 2.709  | 1.095  | 0 |
| 31   | C       | 4.679  | 1.565  | 0 |
| 32   | C       | 6.63   | 3.575  | 0 |
| 33   | C       | 6.033  | 1.224  | 0 |
| 34   | C       | 4.313  | 2.917  | 0 |
| 35   | C       | 5.279  | 3.911  | 0 |
| 36   | C       | 6.991  | 2.234  | 0 |
| 37   | H       | 6.324  | 0.185  | 0 |
| 38   | H       | 3.258  | 3.185  | 0 |
| 39   | H       | 4.972  | 4.952  | 0 |
| 40   | H       | 8.041  | 1.956  | 0 |
| 41   | H       | 7.389  | 4.351  | 0 |
| 42   | N       | -7.607 | 1.499  | 0 |
| 43   | O       | -7.596 | 2.724  | 0 |
| 44   | O       | -8.631 | 0.829  | 0 |

**Table S11:** Optimized geometry of **3a**; CAM-B3LYP/6-31G(d), SMD solvent model (CHCl<sub>3</sub>).

| atom | nucleus | x      | y      | z      |
|------|---------|--------|--------|--------|
| 1    | H       | 6.652  | 2.581  | -0.06  |
| 2    | C       | 6.586  | 1.5    | -0.055 |
| 3    | C       | 6.334  | -1.25  | -0.021 |
| 4    | C       | 5.334  | 0.914  | -0.046 |
| 5    | C       | 7.761  | 0.717  | -0.057 |
| 6    | C       | 7.597  | -0.683 | -0.028 |
| 7    | C       | 5.165  | -0.478 | -0.031 |
| 8    | H       | 4.465  | 1.566  | -0.048 |
| 9    | H       | 8.461  | -1.334 | -0.012 |
| 10   | H       | 6.25   | -2.334 | -0.002 |
| 11   | C       | 1.418  | -1.338 | -0.01  |
| 12   | H       | 1.527  | -2.421 | -0.008 |
| 13   | C       | 0.195  | -0.777 | -0.006 |
| 14   | H       | 0.136  | 0.311  | -0.009 |
| 15   | C       | -1.097 | -1.463 | 0.001  |
| 16   | H       | -2.149 | 0.373  | -0.004 |
| 17   | C       | -2.257 | -0.708 | 0.001  |
| 18   | C       | -2.45  | -3.481 | 0.012  |
| 19   | C       | -3.533 | -1.305 | 0.006  |
| 20   | C       | -1.223 | -2.878 | 0.007  |
| 21   | C       | -3.637 | -2.712 | 0.011  |
| 22   | C       | -4.792 | -0.59  | 0.006  |
| 23   | H       | -0.332 | -3.497 | 0.009  |
| 24   | H       | -2.549 | -4.561 | 0.017  |
| 25   | N       | -5.94  | -1.241 | 0.01   |
| 26   | C       | -5.898 | -2.589 | 0.013  |
| 27   | H       | -6.869 | -3.079 | 0.016  |
| 28   | N       | -4.844 | -3.358 | 0.015  |
| 29   | C       | 2.647  | -0.575 | -0.018 |
| 30   | H       | 2.542  | 0.509  | -0.023 |
| 31   | C       | 3.866  | -1.144 | -0.021 |
| 32   | H       | 3.913  | -2.233 | -0.015 |
| 33   | N       | -4.78  | 0.77   | 0.003  |
| 34   | H       | -3.863 | 1.193  | 0.001  |
| 35   | C       | -5.822 | 1.717  | 0.002  |
| 36   | C       | -7.726 | 3.774  | -0.001 |
| 37   | C       | -7.185 | 1.41   | 0.002  |
| 38   | C       | -5.425 | 3.061  | 0.001  |
| 39   | C       | -6.367 | 4.077  | -0.001 |
| 40   | C       | -8.119 | 2.442  | 0      |
| 41   | H       | -7.501 | 0.378  | 0.003  |
| 42   | H       | -4.365 | 3.306  | 0.001  |
| 43   | H       | -6.036 | 5.111  | -0.002 |
| 44   | H       | -9.175 | 2.188  | 0      |
| 45   | H       | -8.467 | 4.567  | -0.002 |
| 46   | N       | 9.011  | 1.295  | -0.09  |
| 47   | C       | 9.141  | 2.728  | 0.078  |
| 48   | H       | 8.602  | 3.269  | -0.707 |
| 49   | H       | 10.193 | 3.002  | 0.002  |
| 50   | H       | 8.766  | 3.077  | 1.051  |
| 51   | C       | 10.182 | 0.466  | 0.113  |
| 52   | H       | 10.257 | -0.309 | -0.657 |
| 53   | H       | 10.184 | -0.028 | 1.096  |
| 54   | H       | 11.075 | 1.087  | 0.042  |

**Table S12:** Optimized geometry of **3b**; CAM-B3LYP/6-31G(d), SMD solvent model (CHCl<sub>3</sub>).

| atom | nucleus | x       | y      | z      |
|------|---------|---------|--------|--------|
| 1    | H       | -7.022  | 2.671  | 0.055  |
| 2    | C       | -6.964  | 1.59   | 0.025  |
| 3    | C       | -6.763  | -1.177 | -0.046 |
| 4    | C       | -5.718  | 0.975  | 0.022  |
| 5    | C       | -8.121  | 0.81   | -0.008 |
| 6    | C       | -8.01   | -0.582 | -0.044 |
| 7    | C       | -5.583  | -0.417 | -0.015 |
| 8    | H       | -4.836  | 1.607  | 0.05   |
| 9    | H       | -8.918  | -1.177 | -0.068 |
| 10   | H       | -6.693  | -2.261 | -0.073 |
| 11   | C       | -1.845  | -1.335 | -0.011 |
| 12   | H       | -1.964  | -2.416 | -0.019 |
| 13   | C       | -0.621  | -0.78  | 0      |
| 14   | H       | -0.558  | 0.308  | 0.007  |
| 15   | C       | 0.67    | -1.47  | 0.005  |
| 16   | H       | 1.724   | 0.365  | -0.001 |
| 17   | C       | 1.83    | -0.715 | 0.004  |
| 18   | C       | 2.02    | -3.489 | 0.015  |
| 19   | C       | 3.106   | -1.314 | 0.007  |
| 20   | C       | 0.793   | -2.885 | 0.012  |
| 21   | C       | 3.207   | -2.722 | 0.013  |
| 22   | C       | 4.365   | -0.6   | 0.006  |
| 23   | H       | -0.099  | -3.502 | 0.016  |
| 24   | H       | 2.117   | -4.57  | 0.021  |
| 25   | N       | 5.513   | -1.253 | 0.009  |
| 26   | C       | 5.468   | -2.602 | 0.013  |
| 27   | H       | 6.439   | -3.093 | 0.014  |
| 28   | N       | 4.413   | -3.369 | 0.015  |
| 29   | C       | -3.067  | -0.557 | -0.011 |
| 30   | H       | -2.947  | 0.525  | -0.004 |
| 31   | C       | -4.293  | -1.108 | -0.018 |
| 32   | H       | -4.358  | -2.196 | -0.028 |
| 33   | N       | 4.355   | 0.759  | 0.002  |
| 34   | H       | 3.439   | 1.183  | 0.002  |
| 35   | C       | 5.398   | 1.705  | -0.003 |
| 36   | C       | 7.305   | 3.76   | -0.016 |
| 37   | C       | 6.761   | 1.396  | -0.007 |
| 38   | C       | 5.003   | 3.049  | -0.005 |
| 39   | C       | 5.946   | 4.064  | -0.011 |
| 40   | C       | 7.696   | 2.427  | -0.013 |
| 41   | H       | 7.076   | 0.364  | -0.005 |
| 42   | H       | 3.944   | 3.295  | -0.002 |
| 43   | H       | 5.616   | 5.099  | -0.013 |
| 44   | H       | 8.752   | 2.173  | -0.017 |
| 45   | H       | 8.047   | 4.552  | -0.021 |
| 46   | O       | -9.383  | 1.307  | -0.007 |
| 47   | C       | -9.552  | 2.713  | 0.049  |
| 48   | H       | -9.122  | 3.134  | 0.965  |
| 49   | H       | -10.629 | 2.886  | 0.046  |
| 50   | H       | -9.107  | 3.207  | -0.823 |

**Table S13:** Optimized geometry of **3c**; CAM-B3LYP/6-31G(d), SMD solvent model (CHCl<sub>3</sub>).

| atom | nucleus | x      | y      | z      |
|------|---------|--------|--------|--------|
| 1    | H       | 7.6    | 3.527  | -0.178 |
| 2    | C       | 7.617  | 2.444  | -0.097 |
| 3    | C       | 7.646  | -0.32  | 0.106  |
| 4    | C       | 6.423  | 1.739  | -0.094 |
| 5    | C       | 8.833  | 1.772  | 0.002  |
| 6    | C       | 8.843  | 0.386  | 0.103  |
| 7    | C       | 6.415  | 0.34   | 0.009  |
| 8    | H       | 5.487  | 2.282  | -0.177 |
| 9    | H       | 9.784  | -0.149 | 0.18   |
| 10   | H       | 7.66   | -1.403 | 0.185  |
| 11   | C       | 2.765  | -0.877 | -0.003 |
| 12   | H       | 2.971  | -1.945 | 0.035  |
| 13   | C       | 1.499  | -0.428 | -0.034 |
| 14   | H       | 1.342  | 0.649  | -0.066 |
| 15   | C       | 0.277  | -1.232 | -0.026 |
| 16   | H       | -0.945 | 0.493  | -0.026 |
| 17   | C       | -0.95  | -0.593 | -0.021 |
| 18   | C       | -0.873 | -3.371 | -0.016 |
| 19   | C       | -2.163 | -1.31  | -0.011 |
| 20   | C       | 0.29   | -2.652 | -0.024 |
| 21   | C       | -2.129 | -2.722 | -0.009 |
| 22   | C       | -3.485 | -0.722 | -0.003 |
| 23   | H       | 1.237  | -3.18  | -0.032 |
| 24   | H       | -0.867 | -4.456 | -0.016 |
| 25   | N       | -4.565 | -1.482 | 0.002  |
| 26   | C       | -4.387 | -2.82  | 0.001  |
| 27   | H       | -5.306 | -3.403 | 0.004  |
| 28   | N       | -3.264 | -3.484 | -0.003 |
| 29   | C       | 3.921  | -0.005 | -0.015 |
| 30   | H       | 3.718  | 1.063  | -0.053 |
| 31   | C       | 5.185  | -0.457 | 0.02   |
| 32   | H       | 5.338  | -1.535 | 0.063  |
| 33   | H       | 9.766  | 2.328  | -0.001 |
| 34   | N       | -3.607 | 0.634  | 0.002  |
| 35   | H       | -2.737 | 1.144  | 0.005  |
| 36   | C       | -4.74  | 1.471  | 0.01   |
| 37   | C       | -6.846 | 3.32   | 0.025  |
| 38   | C       | -6.064 | 1.024  | -0.002 |
| 39   | C       | -4.484 | 2.848  | 0.029  |
| 40   | C       | -5.526 | 3.761  | 0.036  |
| 41   | C       | -7.099 | 1.954  | 0.006  |
| 42   | H       | -6.267 | -0.035 | -0.016 |
| 43   | H       | -3.456 | 3.203  | 0.038  |
| 44   | H       | -5.303 | 4.823  | 0.051  |
| 45   | H       | -8.123 | 1.593  | -0.003 |
| 46   | H       | -7.664 | 4.032  | 0.031  |

**Table S14:** Optimized geometry of **3d**; CAM-B3LYP/6-31G(d), SMD solvent model (CHCl<sub>3</sub>).

| atom | nucleus | x      | y      | z |
|------|---------|--------|--------|---|
| 1    | H       | 7.027  | 2.909  | 0 |
| 2    | C       | 6.999  | 1.825  | 0 |
| 3    | C       | 6.946  | -0.953 | 0 |
| 4    | C       | 5.789  | 1.158  | 0 |
| 5    | C       | 8.197  | 1.099  | 0 |
| 6    | C       | 8.165  | -0.297 | 0 |
| 7    | C       | 5.736  | -0.245 | 0 |
| 8    | H       | 4.874  | 1.74   | 0 |
| 9    | H       | 9.092  | -0.861 | 0 |
| 10   | H       | 6.926  | -2.038 | 0 |
| 11   | C       | 2.039  | -1.304 | 0 |
| 12   | H       | 2.18   | -2.383 | 0 |
| 13   | C       | 0.808  | -0.765 | 0 |
| 14   | H       | 0.734  | 0.321  | 0 |
| 15   | C       | -0.477 | -1.466 | 0 |
| 16   | H       | -1.541 | 0.363  | 0 |
| 17   | C       | -1.64  | -0.718 | 0 |
| 18   | C       | -1.812 | -3.493 | 0 |
| 19   | C       | -2.912 | -1.324 | 0 |
| 20   | C       | -0.589 | -2.882 | 0 |
| 21   | C       | -3.005 | -2.732 | 0 |
| 22   | C       | -4.175 | -0.617 | 0 |
| 23   | H       | 0.307  | -3.493 | 0 |
| 24   | H       | -1.904 | -4.574 | 0 |
| 25   | N       | -5.319 | -1.277 | 0 |
| 26   | C       | -5.265 | -2.625 | 0 |
| 27   | H       | -6.233 | -3.122 | 0 |
| 28   | N       | -4.205 | -3.387 | 0 |
| 29   | C       | 3.238  | -0.493 | 0 |
| 30   | H       | 3.084  | 0.584  | 0 |
| 31   | C       | 4.482  | -1.002 | 0 |
| 32   | H       | 4.596  | -2.085 | 0 |
| 33   | N       | -4.174 | 0.742  | 0 |
| 34   | H       | -3.261 | 1.173  | 0 |
| 35   | C       | -5.223 | 1.682  | 0 |
| 36   | C       | -7.139 | 3.727  | 0 |
| 37   | C       | -6.584 | 1.366  | 0 |
| 38   | C       | -4.834 | 3.028  | 0 |
| 39   | C       | -5.782 | 4.038  | 0 |
| 40   | C       | -7.524 | 2.392  | 0 |
| 41   | H       | -6.893 | 0.332  | 0 |
| 42   | H       | -3.775 | 3.279  | 0 |
| 43   | H       | -5.457 | 5.074  | 0 |
| 44   | H       | -8.579 | 2.132  | 0 |
| 45   | H       | -7.885 | 4.515  | 0 |
| 46   | C       | 9.452  | 1.791  | 0 |
| 47   | N       | 10.464 | 2.351  | 0 |



**Table S15:** Optimized geometry of **3e**; CAM-B3LYP/6-31G(d), SMD solvent model (CHCl<sub>3</sub>).

| atom | nucleus | x       | y      | z      |
|------|---------|---------|--------|--------|
| 1    | H       | -6.655  | 2.648  | -0.001 |
| 2    | C       | -6.582  | 1.568  | 0      |
| 3    | C       | -6.457  | -1.211 | 0.001  |
| 4    | C       | -5.355  | 0.933  | 0      |
| 5    | C       | -7.74   | 0.797  | 0      |
| 6    | C       | -7.694  | -0.59  | 0.001  |
| 7    | C       | -5.265  | -0.47  | 0.001  |
| 8    | H       | -4.457  | 1.539  | 0      |
| 9    | H       | -8.612  | -1.163 | 0.001  |
| 10   | H       | -6.408  | -2.295 | 0.002  |
| 11   | C       | -1.543  | -1.425 | 0.001  |
| 12   | H       | -1.656  | -2.507 | 0.001  |
| 13   | C       | -0.326  | -0.853 | 0      |
| 14   | H       | -0.281  | 0.235  | -0.001 |
| 15   | C       | 0.975   | -1.521 | 0      |
| 16   | H       | 1.995   | 0.334  | 0      |
| 17   | C       | 2.121   | -0.744 | 0      |
| 18   | C       | 2.359   | -3.515 | -0.001 |
| 19   | C       | 3.407   | -1.32  | 0      |
| 20   | C       | 1.121   | -2.934 | -0.001 |
| 21   | C       | 3.532   | -2.726 | 0      |
| 22   | C       | 4.654   | -0.584 | 0      |
| 23   | H       | 0.241   | -3.567 | -0.001 |
| 24   | H       | 2.477   | -4.594 | -0.001 |
| 25   | N       | 5.812   | -1.219 | 0      |
| 26   | C       | 5.79    | -2.567 | 0      |
| 27   | H       | 6.768   | -3.043 | 0      |
| 28   | N       | 4.748   | -3.353 | 0      |
| 29   | C       | -2.763  | -0.648 | 0      |
| 30   | H       | -2.64   | 0.433  | 0      |
| 31   | C       | -3.993  | -1.192 | 0.001  |
| 32   | H       | -4.076  | -2.277 | 0.002  |
| 33   | N       | 4.623   | 0.774  | 0      |
| 34   | H       | 3.7     | 1.184  | 0      |
| 35   | C       | 5.653   | 1.736  | 0      |
| 36   | C       | 7.53    | 3.818  | 0      |
| 37   | C       | 7.02    | 1.447  | 0      |
| 38   | C       | 5.238   | 3.074  | 0      |
| 39   | C       | 6.167   | 4.103  | 0      |
| 40   | C       | 7.94    | 2.491  | 0      |
| 41   | H       | 7.35    | 0.419  | 0      |
| 42   | H       | 4.176   | 3.306  | 0      |
| 43   | H       | 5.822   | 5.132  | 0      |
| 44   | H       | 8.999   | 2.251  | 0      |
| 45   | H       | 8.26    | 4.62   | 0.001  |
| 46   | N       | -9.034  | 1.465  | -0.001 |
| 47   | O       | -9.053  | 2.69   | -0.001 |
| 48   | O       | -10.043 | 0.77   | 0      |
